# Supplementary material
Source: PubMed Central journal article supplement (PMC9809148)
Supplement: NIHMS1855302-supplement-Supp1.pdf [file NIHMS1855302-supplement-Supp1.pdf]

## Supporting Information

# Evaluation of the Potential of Single Particle ICP-MS for the Accurate Measurement of Number Concentration of AuNPs of Different Sizes and Coatings

Antonio R. Montoro Bustos<sup>1\*</sup>, Karen E. Murphy<sup>1</sup>, Michael R. Winchester<sup>1</sup>

<sup>1</sup>Chemical Sciences Division, Material Measurement Laboratory, National Institute of Standards and Technology, 100 Bureau Drive, Gaithersburg, MD 20899-1070.

Corresponding Author

\* E-mail: [antonio.montorobustos@nist.gov](mailto:antonio.montorobustos@nist.gov)

ABSTRACT: Figures and additional information on the properties of commercial AuNPs, ICP-MS settings for single particle analysis, determination of transport efficiency, analytical performance of spICP-MS for the determination of PNC, total Au mass fraction, comparison between *PNC<sub>direct</sub>* and various derived PNC for commercial AuNPs, computation of uncertainty budget for PNC determination and for the ratio between *PNC<sub>direct</sub>* and derived *PNCs*.

## Table of Contents

|                                                                                                                                                                |      |
|----------------------------------------------------------------------------------------------------------------------------------------------------------------|------|
| Calibration of spICP-MS for NP size determination.....                                                                                                         | S-5  |
| Transport efficiency determination.....                                                                                                                        | S-5  |
| Uncertainty Analysis for the determination of $PNC_{direct}$ .....                                                                                             | S-6  |
| Determination of Au mass fraction by conventional ICP-MS.....                                                                                                  | S-7  |
| Analytical performance of spICP-MS for the determination of $PNC_{direct}$ for NIST RM 8012 and RM 8013.....                                                   | S-8  |
| Table S-1. Properties of AuNPs analyzed in this study.....                                                                                                     | S-12 |
| Table S-2. Instrument operating and data acquisition parameters for spICP-MS analysis.....                                                                     | S-13 |
| Table S-3. Comparison between mean particle diameter by TEM, HR-SEM, and spICP-MS for AuNPs analyzed in this study.....                                        | S-14 |
| Table S-4. Breakdown of uncertainty analysis for spICP-MS determination of $PNC_{direct}$ for NIST RM 8012.....                                                | S-16 |
| Table S-5. Derived $PNC_{mean}$ and $PNC_{distribution}$ for NIST AuNP RMs.....                                                                                | S-17 |
| Table S-6. Breakdown of uncertainty analysis associated with $PNC_{mean}$ for RM 8012.....                                                                     | S-18 |
| Table S-7. Uncertainty budget for the calculation of the derived $PNC_{mean}$ of NIST RM 8012 and RM 8013.....                                                 | S-20 |
| Table S-8. Uncertainty budget for the ratio between $PNC_{direct}$ and $PNC_{mean}$ for RM 8012 and RM 8013.....                                               | S-21 |
| Table S-9. Uncertainty budget for the calculation of $PNC_{distribution}$ of NIST RM 8012 and RM 8013.....                                                     | S-23 |
| Table S-10. Uncertainty budget for the ratio between $PNC_{direct}$ and $PNC_{distribution}$ for RM 8012 and RM 8013.....                                      | S-24 |
| Table S-11. Comparison between mean particle diameters measured by spICP-MS in this study and reference spICP-MS results for AuNPs analyzed in this study..... | S-26 |
| Table S-12. $PNC_{mean}$ and $PNC_{distribution}$ for RM 8012 and RM 8013 derived using simultaneously spICP-MS measurements.....                              | S-28 |

|                                                                                                                                                                                                                  |             |
|------------------------------------------------------------------------------------------------------------------------------------------------------------------------------------------------------------------|-------------|
| <b>Table S-13. Uncertainty budget for the calculation of <math>PNC_{mean}</math> of RM 8012 and RM 8013 derived using spICP-MS size results measured in this study.....</b>                                      | <b>S-29</b> |
| <b>Table S-14. Uncertainty budget for the ratio between <math>PNC_{direct}</math> and <math>PNC_{mean}</math> for RM 8012 and RM 8013 using spICP-MS size results measured in this study.....</b>                | <b>S-30</b> |
| <b>Table S-15. Uncertainty budget for the calculation of <math>PNC_{distribution}</math> of NIST RM 8012 and RM 8013 using spICP-MS size results measured in this study.....</b>                                 | <b>S-31</b> |
| <b>Table S-16. Uncertainty budget for the ratio between <math>PNC_{direct}</math> and <math>PNC_{distribution}</math> for RM 8012 and RM 8013 using spICP-MS size results measured in this study.....</b>        | <b>S-32</b> |
| <b>Table S-17. Average uncertainty budget for spICP-MS determination of <math>PNC_{direct}</math> of 30 nm, 60 nm, and 100 nm commercial AuNPs.....</b>                                                          | <b>S-33</b> |
| <b>Table S-18. Total Au mass fraction provided by the supplier and in-house measurements for different commercial AuNPs analyzed in this study.....</b>                                                          | <b>S-34</b> |
| <b>Table S-19. PNCs derived for different commercial AuNPs.....</b>                                                                                                                                              | <b>S-35</b> |
| <b>Table S-20. Average uncertainty budget for the calculation of <math>PNC_{mean}</math> of 30 nm, 60 nm, and 100 nm commercial AuNPs.....</b>                                                                   | <b>S-38</b> |
| <b>Table S-21. Average uncertainty budget for the ratio between <math>PNC_{direct}</math> and <math>PNC_{mean}</math>, for 30 nm, 60 nm, and 100 nm commercial AuNPs.....</b>                                    | <b>S-40</b> |
| <b>Table S-22. Average uncertainty budget for the calculation of <math>PNC_{distribution}</math> of 30 nm, 60 nm, and 100 nm commercial AuNPs.....</b>                                                           | <b>S-43</b> |
| <b>Table S-23. Average uncertainty budget for the ratio between <math>PNC_{direct}</math> and <math>PNC_{distribution}</math> for 30 nm, 60 nm, and 100 nm commercial AuNPs.....</b>                             | <b>S-45</b> |
| <b>Table S-24. PNC derived for different commercial AuNPs using spICP-MS size results measured in this study.....</b>                                                                                            | <b>S-48</b> |
| <b>Table S-25. Average uncertainty budget for the calculation of <math>PNC_{mean}</math> for different commercial AuNPs using spICP-MS size results measured in this study.....</b>                              | <b>S-50</b> |
| <b>Table S-26. Average uncertainty budget for the calculation of <math>PNC_{distribution}</math> for different commercial AuNPs using spICP-MS size results measured in this study.....</b>                      | <b>S-51</b> |
| <b>Table S-27. Average uncertainty budget for the ratio between <math>PNC_{direct}</math> and <math>PNC_{mean}</math> for different commercial AuNPs using spICP-MS size results measured in this study.....</b> | <b>S-52</b> |
| <b>Table S-28. Average uncertainty budget for the ratio between <math>PNC_{direct}</math> and <math>PNC_{distribution}</math> for commercial AuNPs using spICP-MS size results measured in this study.....</b>   | <b>S-53</b> |

**Figure S-1. Particle number concentration versus number of events for RM 8012 and RM 8013.....S-54**

**Figure S-2. Reference number size distribution histograms for RM 8012.....S-55**

**Figure S-3. Reference number size distribution histograms for RM 8013.....S-56**

**Figure S-4. Comparison for the PNC results and ratio between  $PNC_{direct}$  and derived PNCs for a selection of commercial AuNPs.....S-57**

**REFERENCES.....S-59**

## Calibration of spICP-MS for NP size determination

For the size determination of AuNP samples, a response factor, expressed in counts per ng of Au, was established from the signal intensities measured for RM 8013, used as a calibration standard.<sup>1</sup> In addition, RM 8013 is a well-suited calibration standard for sizing purposes because its particle mass falls in the middle of the range of masses of the materials analyzed in this study, which minimizes potential nonlinear responses. Assuming that AuNPs are spherical, solid, and have the density of bulk gold, and the various samples exhibit a similar response in the plasma to RM 8013, the corresponding mass of each particle event was calculated *via* the measured response factor and converted to particle size by eq S1:

$$d_{NP\ unk} = \left( \frac{I_{NP\ unk} - I_{diss\ unk} - I_{blk}}{I_{NP\ RM} - I_{diss\ RM} - I_{blk}} \right)^{\frac{1}{3}} \times d_{NP\ RM} \times Rep \quad (S1)$$

where  $d_{NP\ unk}$  (nm) is the diameter of the particle in the sample,  $d_{NP\ RM}$  (nm) is the diameter of the particle in the standard,  $I_{NP\ unk}$  and  $I_{NP\ RM}$  (counts) are the intensity of the particle events for the sample and for the standard, respectively,  $I_{diss\ unk}$  and  $I_{diss\ RM}$  (counts) are the intensity of the dissolved background for the sample and for the standard, respectively (note that  $I_{diss} = I_{background} - I_{blk}$  where  $I_{background}$  is all signal not identified as a particle event),  $I_{blk}$  (counts) is the intensity for the water blank, and  $Rep$  is the repeatability factor that represents the within laboratory repeatability of spICP-MS measurements, defined as the standard error of the measurements for  $n$  independent experiments.<sup>1</sup> In this project, the repeatability factor represents the variability of  $PNC_{direct}$  for the analysis of RM 8012 across 15 independent experiments conducted more than four years apart.  $Rep$  is expressed as a relative standard error and so is unitless. It is incorporated into eq S1 and S3 as a component with a value,  $x_i$  of 1 and  $u(x_i) = (s/\sqrt{n})/\text{mean} \times 100$ . Note that for the determination of the particle size and PNC of RM 8013, RM 8012 was used as a calibration standard. In this case, the consensus value for

particle size derived from seven different single particle and ensemble sizing techniques listed in the NIST Reports of Investigation (ROIs)<sup>2,3</sup> applied to either RM 8013 or RM 8012, computed using the NIST “Consensus Builder” (<https://consensus.nist.gov>)<sup>4,5</sup>, were used as particle diameters ( $d_{NP\ RM}$ ) for calibration purposes. This consensus value was 55.6 nm, with an associated standard uncertainty of 0.25 nm for RM 8013, and 26.8 nm, with associated standard uncertainty of 0.51 nm for RM 8012.

### **Transport efficiency determination**

The transport efficiency, defined as the ratio of the amount of analyte entering the plasma to the amount aspirated, is a crucial parameter for the correct particle size and number determination in spICP-MS. Transport efficiency was determined daily using freshly diluted AuNP suspensions of NIST RM 8013 *via* particle frequency method,<sup>6</sup> which is denoted as  $\eta_n$ . The  $\eta_n$  calculates the ratio of the number of detected particles to the theoretical number of particles delivered to the ICP-MS by eq S2:

$$\eta_n = \frac{N_{NP\ RM}}{q_{liq} \times t_{aq} \times PNC_{RM}} \quad (S2)$$

where  $\eta_n$  is the transport efficiency,  $N_{NP\ RM}$  is the number of observed particle events for the calibration standard,  $q_{liq}$  ( $\text{g min}^{-1}$ ) is the sample uptake rate,  $t_{aq}$  (min) is the time of acquisition, and  $PNC_{RM}$  ( $\text{L}^{-1}$ ) is the derived particle number concentration of the gravimetrically diluted calibration standard suspension using eq 3.

### **Uncertainty Analysis for the determination of $PNC_{direct}$**

For purposes of computing the combined uncertainty of  $PNC_{direct}$ , eq S2 and eq 3 were substituted into eq 2 to form the final measurement equation for the spICP-MS measurement of  $PNC_{direct}$ :

$$PNC_{direct} = \frac{N_{NP} \times 6 \times C_{S RM} \times q_{liq RM} \times t_{aq RM}}{N_{NP RM} \times q_{liq} \times t_{aq} \times 1E^{-18} \times d_{NP RM}^3 \times Dil.F_{RM} \times \pi \times \rho} \times Dil.F \times Rep \quad (S3)$$

where  $PNC_{direct}$  ( $L^{-1}$ ) is the target particle number concentration of the sample in the working suspension,  $N_{NP}$  and  $N_{NP RM}$  are the number of observed particle events for the sample and for the standard,  $C_s$  is the Au mass fraction of the standard ( $\mu g \cdot g^{-1}$ ),  $q_{liq}$  and  $q_{liq RM}$  ( $g \cdot min^{-1}$ ) are the sample uptake rates for the sample and for the standard,  $t_{aq}$  and  $t_{aq RM}$  (min) are the times of acquisition for the sample and the standard,  $d_{NP RM}$  (nm) is the diameter of the particle in the standard,  $\pi$  is pi,  $\rho$  is the density of the particle ( $g \cdot cm^{-3}$ ), and  $Dil.F$  and  $Dil.F_{RM}$  are the dilution factors of stock suspension for the sample and for the standard.  $Rep$  is the repeatability factor that represents the variability of spICP-MS, defined as the standard error of the measurements for  $n$  independent experiments. Incomplete ionization of Au in the ICP was not included as a source of uncertainty because a similar behavior between the calibration standard and samples, analyzed under the same experimental conditions, was assumed.

### **Determination of Au mass fraction by conventional ICP-MS.**

A Thermo Electron X Series X7 quadrupole ICP-MS was used for ICP-MS measurements. Samples were introduced into the ICP torch using a Quartz C-type nebulizer and impact bead spray chamber cooled to 2 °C. SRM 3140 Platinum Standard Solution and SRM 3124a Indium Standard Solution were used as internal standards for the determination of the total Au mass fraction. Total gold mass fraction was determined in triplicate after digestion of 0.5 g of the AuNP stock suspensions with a mixture of 0.15 mL of nitric and 1.5 mL of hydrochloric acids. After 1 hour, the mixtures were diluted with 45 mL of an internal standard solution containing Pt and In each at 1 ng  $g^{-1}$  in 1.5 %  $HNO_3$ . Subsequently, 0.063 mL of the diluted samples were added to 14 mL of the internal standard solution. Ionic Au calibration standards were prepared by serial dilution to range in mass fraction from 0.1 ng  $g^{-1}$  to 5 ng  $g^{-1}$  Au (n=6) using the internal standard solution. Procedural blanks (0.5 g of ultrapure water, n=10), calibration

standards and sample digestions were analyzed by ICP-MS using a 0.45 mL min<sup>-1</sup> sample flow rate and continuous data acquisition. Signal intensities at mass to charge (m/z) 115, 195, and 197 were measured at 10 ms dwell time per isotope. Three blocks of data, each 60 s in duration, were acquired per sample, and the mean intensities were used for computations.

**Analytical performance of spICP-MS for the determination of PNC for NIST RM 8012 and RM 8013: linearity, limit of detection and precision of multiple-point calibration, and comparability with analyte transport efficiency determination**

In spICP-MS analysis, very dilute suspensions of NPs are introduced into the ICP-MS instrument, such that statistically only one NP at a time enters the plasma. In these conditions, NP information appears as signal spikes superimposed on the steady state signal of the dissolved analyte. The fundamental assumption behind spICP-MS theory is that each pulse represents a single particle event.<sup>7</sup> Thus, the number of events counted is proportional to PNC (eq 2), which is only valid for low number concentrations that guarantee the detection of one NP per reading. The use of high number concentrations introduces a bias from the linear relationship between the number of events and PNC as a consequence of an increase of the probability of particle coincidence.<sup>8</sup>

The relationship between the number of events experimentally obtained by spICP-MS and the expected PNC concentration derived using the Au concentration and consensus particle size from ROI<sup>2,3</sup> was initially assessed using a multiple-point calibration for both NIST RM AuNPs with 7 different concentration levels (Figure S-1). Expected PNC concentration ranged over almost two orders of magnitude, from 5 x 10<sup>5</sup> L<sup>-1</sup> to 3.5 x 10<sup>7</sup> L<sup>-1</sup>. Calibration using RM 8013 resulted in a slightly steeper slope (dotted line,  $m_{\text{RM 8013}} = 4.80 \times 10^{-5} \pm 0.10 \times 10^{-5}$  events L,  $R^2 = 0.9979$ ) and a slightly better coefficient of determination compared to calibration using



RM 8012 (dashed line,  $m_{\text{RM 8012}} = 4.59 \times 10^{-5} \pm 0.13 \times 10^{-5}$  events L,  $R^2 = 0.9959$ ). The difference of the slopes was 4.3 %, which indicates similar behavior of both NIST RM suspensions at the measured PNC levels. In fact, slopes of the calibration plots obtained from both NIST RMs were statistically similar, which confirms that the linear relationship between the number of events and expected PNC is independent of the particle diameter. The agreement between the slopes also indicate that the Au mass fraction and consensus particle diameter of each material, used to compute the derived PNC, reliably represent these two parameters. Overall, linearity between the number of events and the expected PNC was confirmed across the range of concentrations of the working suspensions. Besides high homogeneity, high stability, and the negligible presence of unbound Au,<sup>2,3</sup> the good linearity achieved also shows the absence of coincident particle events.

The counting of NP events can be assimilated to an ideal Poisson counting process with zero blank, whose signal detection limit, based on the Currie Poisson-Normal approximation,<sup>9</sup> is associated with the capability of counting three NP events when no NP events are detected in a well-known procedural blank.<sup>8</sup> Thus, considering the slopes of the calibration plots, listed above, a limit of detection for PNC of  $6.5 \times 10^4 \text{ L}^{-1}$  was obtained under the experimental conditions used in this work. This value is very similar to others reported in the literature when the time of analysis is adjusted.<sup>10,11</sup>

Precision of the PNC determination depends on the number of events counted. Using the acquisition conditions indicated in the Instrumentation section, relative standard deviations of 1.5% ( $n = 9$ ) were obtained for RM 8013 at  $1.5 \times 10^7 \text{ L}^{-1}$ , which entailed counting a total of 8500 events.

The most popular approach used in the literature for the determination of PNC by spICP-MS relies on the calculation of the analyte transport efficiency (eq S1). Between the different methods available for the calculation of transport efficiency, such as the particle size,<sup>6</sup> and the recently introduced dynamic mass flow approach,<sup>12</sup> the particle frequency method has been more extensively applied for the determination of PNC.<sup>6</sup> The last one is generally preferred over multi-point calibration, typically used to evaluate the linear relationship between the number of events and the number concentration, because it is a simplified version of the former that can be considered as a calibration with just one standard without compromising the uncertainty associated with the results.<sup>8</sup> For the evaluation of the capabilities of one-point calibration, a PNC of  $1.5 \times 10^7 \text{ L}^{-1}$  from Figure S-1 was selected considering excellent precision and sufficient counting statistics. In case of RM 8013, the proportionality (or response) factor of the number of events and PNC for one-point calibration only differed by 0.60 % from the slope of the multiple-point calibration. This excellent agreement suggests that the selection of multiple-point or one-point calibration is not critical to achieve accurate determinations of PNC, provided NP standards and samples are diluted to an appropriate PNC to avoid coincident events. Note that to be sure that accurate results are obtained for unknown samples with a single point calibration requires a priori information on the number concentration or multiple runs until the proper dilution is achieved. This finding also justifies that, for the rest of the experiments, the quantification of PNC was carried out based on the more straightforward determination of the analyte transport efficiency (eq S1) and application of eq 2.

The long-term intermediate precision of the determination of transport efficiency using the frequency-based method was assessed for the analysis of RM 8012 and RM 8013 at a nominal PNC of  $1.5 \times 10^7 \text{ L}^{-1}$  in fifteen separate experiments conducted more than four years apart

using the same sample introduction system. Transport efficiency values of  $1.94 \pm 0.04 \%$  and  $1.85 \pm 0.05 \%$  were obtained using RM 8013, and RM 8012, respectively. Thus, measures of transport efficiency and for the estimated expanded uncertainty,  $U$ , at the 95 % coverage interval (95% C.I.,  $< 3 \%$  relative) yielded statistically similar results for both NIST RMs under long-term intermediate precision conditions,<sup>13</sup> which rules out any size dependent changes in transport efficiency<sup>14</sup> as well as degradation of the stock suspensions for these particular materials. The average probability of particle coincidence among the number of particle events, estimated by Poisson statistics,<sup>15</sup> was 1.1 % under the experimental conditions, which is considered appropriate to enable an accurate determination of PNC.

Considering the linear range, excellent long-term intermediate precision, together with an effective mitigation of undesired particle coincidence while maintaining adequate particle flow, a nominal PNC of  $1.5 \times 10^7 \text{ L}^{-1}$  was selected as the target concentration for the working suspensions of AuNP RM 8013, for the determination of the transport efficiency, as well as for all AuNP materials for the remainder of this study.

## TABLES

**Table S-1. Properties of gold nanoparticles (AuNPs) analyzed in this study.**

| AuNPs                        | Diameter (TEM), nm <sup>a</sup> | Hydrodynamic Diameter, nm | Au Mass Fraction, mg L <sup>-1</sup> | pH of solution | Particle Surface | Solvent             |
|------------------------------|---------------------------------|---------------------------|--------------------------------------|----------------|------------------|---------------------|
| <b>NIST RM 8012, 30 nm</b>   | 27.6 ± 2.1 <sup>b</sup>         | 28.6 ± 0.9 <sup>c</sup>   | 0.048                                | 7.0            | Sodium Citrate   | Milli-Q Water       |
| <b>NIST RM 8013, 60 nm</b>   | 56.0 ± 0.5 <sup>b</sup>         | 56.6 ± 1.4 <sup>c</sup>   | 0.052                                | 7.3            | Sodium Citrate   | Milli-Q Water       |
| <b>30 nm PVP</b>             | 29.7 ± 2.6                      | 44.2                      | 0.050                                | 8.7            | PVP              | Milli-Q Water       |
| <b>30 nm bPEI</b>            | 30.9 ± 2.9                      | 27.0                      | 0.052                                | 8.9            | bPEI             | Milli-Q Water       |
| <b>30 nm PEG</b>             | 32.7 ± 11.0                     | 61.4                      | 0.051                                | 6.1            | mPEG 5 kDa       | Milli-Q Water       |
| <b>60 nm PVP</b>             | 55.9 ± 7.9                      | 92.3                      | 0.054                                | 5.9            | PVP              | Milli-Q Water       |
| <b>60 nm bPEI first lot</b>  | 63.7 ± 7.3                      | 79.1                      | 0.052                                | 8.9            | bPEI             | Milli-Q Water       |
| <b>60 nm bPEI second lot</b> | 61.0 ± 6.1                      | 74.6                      | 0.053                                | 7.7            | bPEI             | Milli-Q Water       |
| <b>60 nm PEG first lot</b>   | 65.3 ± 12.3                     | 96.5                      | 0.053                                | 6.0            | mPEG 5 kDa       | Milli-Q Water       |
| <b>60 nm PEG second lot</b>  | 64.1 ± 6.9                      | 71.7                      | 0.050                                | 5.8            | mPEG 5 kDa       | Milli-Q Water       |
| <b>100 nm Citrate</b>        | 104.0 ± 13.1                    | 108.0                     | 0.052                                | 8.1            | Sodium Citrate   | Aqueous 2mM Citrate |
| <b>100 nm PVP</b>            | 100.0 ± 7.4                     | 130.0                     | 0.052                                | 5.9            | PVP              | Milli-Q Water       |
| <b>100 nm bPEI</b>           | 98.1 ± 10.1                     | 108.5                     | 0.052                                | 8.7            | bPEI             | Milli-Q Water       |
| <b>100 nm PEG</b>            | 104.7 ± 14.5                    | 134.8                     | 0.054                                | 5.7            | mPEG 5 kDa       | Milli-Q Water       |

<sup>a</sup> Uncertainties correspond to one standard deviation, NPs analyzed n=100.

<sup>b</sup> Values indicate that the mean and uncertainties are the expanded uncertainty of the mean for 95% coverage, but only measurement repeatability was accounted for, NPs analyzed n=4364 for RM 8012 and 3030 for RM 8013.

<sup>c</sup> Expressed as Dynamic Light Scattering at 173° scattering angle (backscatter).

**Table S-2. Instrument operating and data acquisition parameters for spICP-MS analysis**

|                                                     |                                                                                      |
|-----------------------------------------------------|--------------------------------------------------------------------------------------|
| Instrument                                          | Thermo Electron X Series X7 quadrupole ICP-MS                                        |
| Sample introduction                                 | Quartz C-type concentric nebulizer, cooled (2 °C)<br>glass impact bead spray chamber |
| Type of Cones                                       | High sensitivity (Xs) nickel sampler and skimmer                                     |
| RF power (W)                                        | 1400                                                                                 |
| Plasma gas flow (L min <sup>-1</sup> )              | 13.0                                                                                 |
| Auxiliary gas flow (L min <sup>-1</sup> )           | 0.90                                                                                 |
| Nebulizer gas flow (L min <sup>-1</sup> )           | 0.86                                                                                 |
| Sampling depth (mm)                                 | 15                                                                                   |
| Nominal sample flow rate<br>(mL min <sup>-1</sup> ) | 0.5                                                                                  |
| Dwell time (ms)                                     | 10                                                                                   |
| Acquisition time (s)                                | 360                                                                                  |

**Table S-3. Comparison between mean particle diameter, expressed as Huber estimates of particle size location (or central tendency), by TEM (results provided by the supplier)<sup>2,3,16</sup> and results reported by HR-SEM<sup>1</sup> and spICP-MS<sup>1</sup> for NIST RM 8012 and 8013, and for different commercial AuNPs, respectively.**

|                                   | TEM supplier | HR-SEM diameter               | spICP-MS diameter             |
|-----------------------------------|--------------|-------------------------------|-------------------------------|
| <b>RM 8012 (nm)</b>               | 27.0 ± 0.1   | 27.0 ± 0.1 (3.2) <sup>a</sup> | 27.2 ± 0.1 (0.8) <sup>a</sup> |
| NPs analyzed                      | 4364         | 14745                         | 5055                          |
| MAD (nm)                          | 1.9          | 1.8                           | 2.0                           |
| <b>RM 8013</b>                    | 55.5 ± 0.1   | 55.0 ± 0.1 (3.6) <sup>a</sup> | 54.1 ± 0.1 (7.6) <sup>a</sup> |
| NPs analyzed                      | 3030         | 3137                          | 5964                          |
| MAD (nm)                          | 3.3          | 3.0                           | 3.4                           |
| <b>30 nm PVP (nm)</b>             | 29.8 ± 0.4   | 29.5 ± 0.1 (3.2) <sup>a</sup> | 30.0 ± 0.1 (0.6) <sup>a</sup> |
| NPs analyzed                      | 137          | 4811                          | 2705                          |
| MAD (nm)                          | 2.4          | 2.1                           | 2.4                           |
| <b>30 nm bPEI (nm)</b>            | 30.8 ± 0.6   | 31.5 ± 0.1 (3.3) <sup>a</sup> | 31.0 ± 0.2 (0.6) <sup>a</sup> |
| NPs analyzed                      | 100          | 7255                          | 1575                          |
| MAD (nm)                          | 2.8          | 3.9                           | 3.2                           |
| <b>30 nm PEG (nm)</b>             | 32.6 ± 0.6   | 29.9 ± 0.1 (3.2) <sup>a</sup> | 30.6 ± 0.1 (0.7) <sup>a</sup> |
| NPs analyzed                      | 125          | 3985                          | 2743                          |
| MAD (nm)                          | 3.2          | 3.2                           | 3.0                           |
| <b>60 nm PVP (nm)</b>             | 56.3 ± 1.6   | 59.6 ± 0.2 (3.7) <sup>a</sup> | 58.6 ± 0.4 (0.9) <sup>a</sup> |
| NPs analyzed                      | 100          | 11515                         | 1812                          |
| MAD (nm)                          | 8.4          | 7.5                           | 7.0                           |
| <b>60 nm bPEI first lot (nm)</b>  | 64.4 ± 1.5   | 60.3 ± 0.2 (3.7) <sup>a</sup> | 60.2 ± 0.3 (1.1) <sup>a</sup> |
| NPs analyzed                      | 100          | 3236                          | 1706                          |
| MAD (nm)                          | 6.8          | 6.5                           | 6.4                           |
| <b>60 nm bPEI second lot (nm)</b> | 61.6 ± 1.4   | 58.9 ± 0.2 (3.6) <sup>a</sup> | 58.8 ± 0.3 (1.2) <sup>a</sup> |
| NPs analyzed                      | 100          | 6290                          | 3920                          |
| MAD (nm)                          | 4.7          | 6.3                           | 8.7                           |
| <b>60 nm PEG first lot (nm)</b>   | 65.5 ± 1.6   | 57.8 ± 0.3 (3.6) <sup>a</sup> | 56.7 ± 0.3 (0.8) <sup>a</sup> |

|                                  |                 |                        |                        |
|----------------------------------|-----------------|------------------------|------------------------|
| NPs analyzed                     | 100             | 2538                   | 2562                   |
| MAD (nm)                         | 8.4             | 8.5                    | 8.1                    |
| <b>60 nm PEG second lot (nm)</b> | $64.6 \pm 1.5$  | $59.7 \pm 0.2 (3.7)^a$ | $58.3 \pm 0.3 (2.9)^a$ |
| NPs analyzed                     | 100             | 6279                   | 3409                   |
| MAD (nm)                         | 6.6             | 8.0                    | 8.1                    |
| <b>100 nm Citrate (nm)</b>       | $105.0 \pm 2.6$ | $98.8 \pm 0.3 (4.5)^a$ | $93.2 \pm 0.6 (2.0)^a$ |
| NPs analyzed                     | 100             | 6303                   | 2820                   |
| MAD (nm)                         | 15.0            | 11.7                   | 14.9                   |
| <b>100 nm PVP (nm)</b>           | $100.2 \pm 1.4$ | $95.5 \pm 0.2 (4.4)^a$ | $95.5 \pm 0.6 (3.5)^a$ |
| NPs analyzed                     | 100             | 7293                   | 1921                   |
| MAD (nm)                         | 8.4             | 8.1                    | 11.4                   |
| <b>100 nm bPEI (nm)</b>          | $99.1 \pm 2.2$  | $95.8 \pm 0.3 (4.4)^a$ | $94.4 \pm 0.5 (2.5)^a$ |
| NPs analyzed                     | 102             | 5200                   | 2982                   |
| MAD (nm)                         | 6.9             | 7.5                    | 11.6                   |
| <b>100 nm PEG (nm)</b>           | $105.5 \pm 2.8$ | $94.4 \pm 0.4 (4.4)^a$ | $98.8 \pm 0.6 (3.8)^a$ |
| NPs analyzed                     | 125             | 3007                   | 2451                   |
| MAD (nm)                         | 14.1            | 12.8                   | 15.6                   |

Values indicate the Huber estimates of particle-size location and the standard uncertainty associated with the Huber estimate.

<sup>a</sup> Expanded uncertainties associated with the spICP-MS and HR-SEM size determinations included a best estimate of known or suspected sources of bias were included in the parenthetical uncertainty computation.

**Table S-4. Breakdown of uncertainty analysis for spICP-MS determination of  $PNC_{direct}$  for NIST RM 8012. Values for the input quantities correspond to a representative spICP-MS determination of  $PNC_{direct}$  of the fifteen experiments.**

| Source of uncertainty                                                         | Quantity Value        | Standard Uncertainty   | Description                                                                                               | Relative Contribution (%) |
|-------------------------------------------------------------------------------|-----------------------|------------------------|-----------------------------------------------------------------------------------------------------------|---------------------------|
| Particle size consensus value for standard ( $d_{NP\ RM}$ ) (nm)              | 55.6                  | 0.25 (B)               | Estimated standard uncertainty from the seven ROI-reported diameter measurements for RM 8013 <sup>3</sup> | 4.3                       |
| Dilution Factor of stock suspension for the sample ( $Dil.F$ ) (g)            | $7.45 \times 10^6$    | $6.51 \times 10^4$ (B) | Estimated standard uncertainty of the gravimetrically measured sample dilution factor                     | 1.8                       |
| Measurement repeatability ( $Rep$ )                                           | 1                     | 0.017 (A)              | Relative standard error of the results for n = 15 experiments                                             | 6.7                       |
| Number of observed events for the sample ( $N_{NP}$ )                         | 551                   | 27 (A)                 | Standard uncertainty of three replicate measurements of the number of particles                           | 55.1                      |
| Au mass fraction of the standard ( $C_s$ ) ( $\mu\text{g g}^{-1}$ )           | 51.86                 | 0.32 (A)               | Combined standard uncertainty of the Au mass fraction measurement for RM 8013 from the ROI <sup>3</sup>   | 0.9                       |
| Sample uptake rate for the standard ( $q_{liq\ RM}$ ) ( $\text{g min}^{-1}$ ) | 0.582                 | 0.00291 (A)            | Standard uncertainty of three replicate measurements of the sample flow rate for RM 8013                  | 0.6                       |
| Time of acquisition for the standard ( $t_{aq\ RM}$ ) (min)                   | 1.66                  | 0.0002 (A)             | Standard uncertainty of the analysis time for three replicates measurement of RM 8013                     | 0.0                       |
| Number of observed events for the standard ( $N_{NP\ RM}$ )                   | 522                   | 19 (A)                 | Standard uncertainty of three replicate measurements of the number of particles for RM 8013               | 29.1                      |
| Sample uptake rate for the sample ( $q_{liq}$ ) ( $\text{g min}^{-1}$ )       | 0.582                 | 0.00291 (A)            | Standard uncertainty of three replicate measurements of the sample flow rate                              | 0.6                       |
| Time of acquisition for the sample ( $t_{aq}$ ) (min)                         | 1.66                  | 0.0002 (A)             | Standard uncertainty of the analysis time for three replicates measurement of the sample                  | 0.0                       |
| Dilution Factor of stock suspension for the standard ( $Dil.F_{RM}$ ) (g)     | $1.05 \times 10^6$    | $7.23 \times 10^3$ (B) | Estimated standard uncertainty of the gravimetrically measured RM 8013 dilution factor                    | 1.1                       |
| Density of the particles ( $\rho$ ) ( $\text{g cm}^{-3}$ )                    | 19.30                 | 0.01 (B)               | Estimated standard uncertainty of the bulk density of Au <sup>17</sup>                                    | 0.0                       |
| <b>MF Value, <math>PNC_{direct}</math> RM 8012</b> ( $\text{L}^{-1}$ )        | $2.24 \times 10^{14}$ |                        |                                                                                                           |                           |
| Combined standard uncertainty, $uc$ ( $\text{L}^{-1}$ )                       | $1.5 \times 10^{13}$  |                        |                                                                                                           |                           |
| Expanded k=2 uncertainty, U ( $\text{L}^{-1}$ )                               | $2.9 \times 10^{13}$  |                        |                                                                                                           |                           |
| % Relative Expanded, $U_r$                                                    | 12.9 %                |                        |                                                                                                           |                           |

(A) and (B) correspond to Type A and Type B methods used for the evaluation of uncertainty.



**Table S-5. PNC values derived for NIST AuNP RMs based on the combination of Au mass fraction<sup>2,3</sup> with: (first column) the Huber estimates of particle size location (or central tendency), or (second column) the full particle size distribution reported by TEM (NIST ROI),<sup>2,3</sup> HR-SEM,<sup>1</sup> and spICP-MS.<sup>1</sup>**

|                         | Central Tendency ( $PNC_{mean}$ ) <sup>a</sup>               | Full PSD ( $PNC_{distribution}$ )                                       |
|-------------------------|--------------------------------------------------------------|-------------------------------------------------------------------------|
| <b>RM 8012</b>          |                                                              |                                                                         |
| Reported diameter (ROI) | $2.48 \times 10^{14} \pm 0.28 \times 10^{14} \text{ L}^{-1}$ | $2.63 \times 10^{14} \pm 0.31 \times 10^{14} \text{ L}^{-1} \text{ }^c$ |
| HR-SEM <sup>b</sup>     | $2.42 \times 10^{14} \pm 0.93 \times 10^{14} \text{ L}^{-1}$ | $2.47 \times 10^{14} \pm 0.94 \times 10^{14} \text{ L}^{-1}$            |
| spICP-MS <sup>b</sup>   | $2.37 \times 10^{14} \pm 0.21 \times 10^{14} \text{ L}^{-1}$ | $2.76 \times 10^{14} \pm 0.29 \times 10^{14} \text{ L}^{-1}$            |
| <b>RM 8013</b>          |                                                              |                                                                         |
| Reported diameter (ROI) | $2.99 \times 10^{13} \pm 0.09 \times 10^{13} \text{ L}^{-1}$ | $3.10 \times 10^{13} \pm 0.13 \times 10^{13} \text{ L}^{-1} \text{ }^c$ |
| HR-SEM <sup>b</sup>     | $3.08 \times 10^{13} \pm 0.61 \times 10^{13} \text{ L}^{-1}$ | $3.14 \times 10^{13} \pm 0.62 \times 10^{13} \text{ L}^{-1}$            |
| spICP-MS <sup>b</sup>   | $3.24 \times 10^{13} \pm 1.43 \times 10^{13} \text{ L}^{-1}$ | $3.37 \times 10^{13} \pm 1.49 \times 10^{13} \text{ L}^{-1}$            |

<sup>a</sup> Assumes all analyte is present as spherical NPs of the central tendency diameter.

<sup>b</sup> Expanded uncertainties associated with the spICP-MS and HR-SEM size determinations included a best estimate of known or suspected sources of bias.<sup>1</sup>

<sup>c</sup> PNC derived from the full particle size distribution obtained by TEM (NIST Report of Investigation).<sup>2,3</sup>

Listed uncertainties are based on a confidence interval, with the coverage factor,  $k = 2$  corresponding to approximately 95 % confidence.

**Table S-6. Breakdown of uncertainty analysis associated with  $PNC_{mean}$  for RM 8012 derived based on the combination of Au mass fraction with the particle size consensus value,<sup>2,3</sup> and mean particle diameter reported by HR-SEM,<sup>1</sup> and spICP-MS.<sup>1</sup>**

| <b>Report diameter (ROI):</b>                                                 |                       |                             |                                                                                                           |                                  |
|-------------------------------------------------------------------------------|-----------------------|-----------------------------|-----------------------------------------------------------------------------------------------------------|----------------------------------|
| <b>Source of uncertainty</b>                                                  | <b>Quantity Value</b> | <b>Standard Uncertainty</b> | <b>Description</b>                                                                                        | <b>Relative contribution (%)</b> |
| Au mass fraction of the material ( $C_s$ ) ( $\mu\text{g g}^{-1}$ )           | 48.17                 | 0.17 (A)                    | Combined standard uncertainty of the Au mass fraction measurement for RM 8012 from the ROI <sup>3</sup>   | 0.4                              |
| Particle size for the material ( $d_{NP\text{ RM}}$ ) (nm)                    | 26.8                  | 0.51 (B)                    | Estimated standard uncertainty from the seven ROI-reported diameter measurements for RM 8012 <sup>3</sup> | 99.6                             |
| Density of the particles ( $\rho$ ) ( $\text{g cm}^{-3}$ )                    | 19.30                 | 0.01 (B)                    | Estimated standard uncertainty of the bulk density of Au <sup>17</sup>                                    | 0.0                              |
| <b>MF Value, <math>PNC_{mean}</math> RM 8012 (<math>\text{L}^{-1}</math>)</b> | $2.48 \times 10^{14}$ |                             |                                                                                                           |                                  |
| Combined standard uncertainty ( $\text{L}^{-1}$ )                             | $1.4 \times 10^{13}$  |                             |                                                                                                           |                                  |
| Expanded k=2 uncertainty ( $\text{L}^{-1}$ )                                  | $2.8 \times 10^{13}$  |                             |                                                                                                           |                                  |
| % Relative Expanded, $U_r$                                                    | 11.3 %                |                             |                                                                                                           |                                  |
| <b>HR-SEM</b>                                                                 |                       |                             |                                                                                                           |                                  |
| <b>Source of uncertainty</b>                                                  | <b>Quantity Value</b> | <b>Standard Uncertainty</b> | <b>Description</b>                                                                                        | <b>Relative contribution (%)</b> |
| Au mass fraction of the material ( $C_s$ ) ( $\mu\text{g g}^{-1}$ )           | 48.17                 | 0.17 (A)                    | Combined standard uncertainty of the Au mass fraction measurement for RM 8012 from the ROI <sup>3</sup>   | 0.1                              |
| Particle size for the material ( $d_{NP\text{ RM}}$ ) (nm)                    | 27.0                  | 1.62 (B)                    | Estimated standard uncertainty of the HR-SEM particle diameter reported for RM 8012 <sup>1</sup>          | 99.9                             |
| Density of the particles ( $\rho$ ) ( $\text{g cm}^{-3}$ )                    | 19.30                 | 0.01 (B)                    | Estimated standard uncertainty of the bulk density of Au <sup>17</sup>                                    | 0.0                              |
| <b>MF Value, <math>PNC_{mean}</math> RM 8012 (<math>\text{L}^{-1}</math>)</b> | $2.42 \times 10^{14}$ |                             |                                                                                                           |                                  |
| Combined standard uncertainty ( $\text{L}^{-1}$ )                             | $4.7 \times 10^{13}$  |                             |                                                                                                           |                                  |
| Expanded k=2 uncertainty ( $\text{L}^{-1}$ )                                  | $9.3 \times 10^{13}$  |                             |                                                                                                           |                                  |
| % Relative Expanded, $U_r$                                                    | 38.2 %                |                             |                                                                                                           |                                  |

spICP-MS

| Source of uncertainty                                                | Quantity Value        | Standard Uncertainty | Description                                                                                             | Relative contribution (%) |
|----------------------------------------------------------------------|-----------------------|----------------------|---------------------------------------------------------------------------------------------------------|---------------------------|
| Au mass fraction of the material ( $C_S$ ) ( $\mu\text{g g}^{-1}$ )  | 48.17                 | 0.17 (A)             | Combined standard uncertainty of the Au mass fraction measurement for RM 8012 from the ROI <sup>3</sup> | 0.7                       |
| Particle size for the material ( $d_{NP, RM}$ ) (nm)                 | 27.2                  | 0.4 (B)              | Estimated standard uncertainty of the spICP-MS particle diameter reported for RM 8012 <sup>1</sup>      | 99.3                      |
| Density of the particles ( $\rho$ ) ( $\text{g cm}^{-3}$ )           | 19.30                 | 0.01 (B)             | Estimated standard uncertainty of the bulk density of Au <sup>17</sup>                                  | 0.0                       |
| <b>MF Value, <math>PNC_{mean}</math> RM 8012</b> ( $\text{L}^{-1}$ ) | $2.37 \times 10^{14}$ |                      |                                                                                                         |                           |
| Combined standard uncertainty ( $\text{L}^{-1}$ )                    | $1.1 \times 10^{13}$  |                      |                                                                                                         |                           |
| Expanded k=2 uncertainty ( $\text{L}^{-1}$ )                         | $2.1 \times 10^{13}$  |                      |                                                                                                         |                           |
| % Relative Expanded, $U_r$                                           | 8.9 %                 |                      |                                                                                                         |                           |

(A) and (B) correspond to Type A and Type B methods used for the evaluation of uncertainty.

**Table S-7. Uncertainty budget for the calculation of the derived  $PNC_{mean}$  of NIST RM 8012 and RM 8013. Consensus value derived from the seven measurement results listed in the NIST ROIs<sup>2,3</sup> (first column), and the Huber estimates of particle size (or central tendency) obtained by HR-SEM<sup>1</sup> (second column), and spICP-MS<sup>1</sup> (third column) for NIST AuNP RMs were combined with Au mass fraction<sup>2,3</sup> to derive  $PNC_{mean}$ .**

| <b>For NIST RM 8012:</b>                               |                                                                                                                |                                                                                                 |                                                                                                   |
|--------------------------------------------------------|----------------------------------------------------------------------------------------------------------------|-------------------------------------------------------------------------------------------------|---------------------------------------------------------------------------------------------------|
|                                                        | <b>Report diameter (ROI)<br/>(<math>PNC_{mean}</math><br/><math>2.48 \times 10^{14} \text{ L}^{-1}</math>)</b> | <b>HR-SEM<br/>(<math>PNC_{mean}</math><br/><math>2.42 \times 10^{14} \text{ L}^{-1}</math>)</b> | <b>spICP-MS<br/>(<math>PNC_{mean}</math><br/><math>2.37 \times 10^{14} \text{ L}^{-1}</math>)</b> |
| <b>Source of uncertainty</b>                           | <b>Relative contribution (%)</b>                                                                               | <b>Relative contribution (%)</b>                                                                | <b>Relative contribution (%)</b>                                                                  |
| Au mass fraction of the material ( $C_S$ )             | 0.4                                                                                                            | < 0.0                                                                                           | 0.6                                                                                               |
| Particle size for the material ( $d_{NP \text{ RM}}$ ) | 99.3                                                                                                           | 96.9                                                                                            | 99.2                                                                                              |
| Density of the particles ( $\rho$ )                    | < 0.0                                                                                                          | < 0.0                                                                                           | < 0.0                                                                                             |
| Residual                                               | 0.3                                                                                                            | 3.2                                                                                             | 0.3                                                                                               |
| Combined standard uncertainty ( $\text{L}^{-1}$ )      | $1.4 \times 10^{13} \text{ L}^{-1}$                                                                            | $4.7 \times 10^{13} \text{ L}^{-1}$                                                             | $1.1 \times 10^{13} \text{ L}^{-1}$                                                               |
| Expanded k=2 uncertainty ( $\text{L}^{-1}$ )           | $2.8 \times 10^{13} \text{ L}^{-1}$                                                                            | $9.3 \times 10^{13} \text{ L}^{-1}$                                                             | $2.1 \times 10^{13} \text{ L}^{-1}$                                                               |

| <b>For NIST RM 8013:</b>                               |                                                                                                                |                                                                                                 |                                                                                                   |
|--------------------------------------------------------|----------------------------------------------------------------------------------------------------------------|-------------------------------------------------------------------------------------------------|---------------------------------------------------------------------------------------------------|
|                                                        | <b>Report diameter (ROI)<br/>(<math>PNC_{mean}</math><br/><math>2.99 \times 10^{13} \text{ L}^{-1}</math>)</b> | <b>HR-SEM<br/>(<math>PNC_{mean}</math><br/><math>3.08 \times 10^{13} \text{ L}^{-1}</math>)</b> | <b>spICP-MS<br/>(<math>PNC_{mean}</math><br/><math>3.24 \times 10^{13} \text{ L}^{-1}</math>)</b> |
| <b>Source of uncertainty</b>                           | <b>Relative contribution (%)</b>                                                                               | <b>Relative contribution (%)</b>                                                                | <b>Relative contribution (%)</b>                                                                  |
| Au mass fraction of the material ( $C_S$ )             | 17.2                                                                                                           | 0.4                                                                                             | 0.1                                                                                               |
| Particle size for the material ( $d_{NP \text{ RM}}$ ) | 82.7                                                                                                           | 98.7                                                                                            | 95.7                                                                                              |
| Density of the particles ( $\rho$ )                    | 0.1                                                                                                            | < 0.0                                                                                           | < 0.0                                                                                             |
| Residual                                               | < 0.0                                                                                                          | 0.9                                                                                             | 4.2                                                                                               |
| Combined standard uncertainty ( $\text{L}^{-1}$ )      | $0.04 \times 10^{13} \text{ L}^{-1}$                                                                           | $0.31 \times 10^{13} \text{ L}^{-1}$                                                            | $0.7 \times 10^{13} \text{ L}^{-1}$                                                               |
| Expanded k=2 uncertainty ( $\text{L}^{-1}$ )           | $0.09 \times 10^{13} \text{ L}^{-1}$                                                                           | $0.61 \times 10^{13} \text{ L}^{-1}$                                                            | $1.4 \times 10^{13} \text{ L}^{-1}$                                                               |

**Table S-8. Uncertainty budget for the ratio between  $PNC_{direct}$  obtained across 15 independent spICP-MS experiments, expressed in percentage, and  $PNC_{mean}$  for RM 8012 and RM 8013.  $PNC_{mean}$  values reported for purposes of comparison to  $PNC_{direct}$  were derived based on the combination of Au mass fraction<sup>2,3</sup> and: the consensus value derived from the seven measurement results listed in the NIST ROIs<sup>2,3</sup> (first column), and the Huber estimates of particle size (or central tendency) reported by HR-SEM<sup>1</sup> (second column), and spICP-MS<sup>1</sup> (third column).**

|                                                                       | <b>Reported diameter (ROI)<br/>(<math>PNC_{direct}/PNC_{mean}</math>)<br/>95.9 %</b> | <b>HR-SEM diameter<br/>(<math>PNC_{direct}/PNC_{mean}</math>)<br/>98.4 %</b> | <b>spICP-MS diameter<br/>(<math>PNC_{direct}/PNC_{mean}</math>)<br/>100.4 %</b> |
|-----------------------------------------------------------------------|--------------------------------------------------------------------------------------|------------------------------------------------------------------------------|---------------------------------------------------------------------------------|
| <b>For NIST RM 8012:</b>                                              |                                                                                      |                                                                              |                                                                                 |
| <b>Source of uncertainty</b>                                          | <b>Relative contribution (%)</b>                                                     | <b>Relative contribution (%)</b>                                             | <b>Relative contribution (%)</b>                                                |
| Particle size consensus value for standard ( $d_{NP\ RM}$ )           | 0.3                                                                                  | < 0.0                                                                        | 0.4                                                                             |
| Dilution Factor of stock suspension for the sample ( $Dil.F$ )        | 0.1                                                                                  | < 0.0                                                                        | 0.2                                                                             |
| Measurement repeatability ( $Rep$ )                                   | 0.4                                                                                  | < 0.0                                                                        | 0.7                                                                             |
| Number of observed events for the sample ( $N_{NP}$ )                 | 3.6                                                                                  | 0.3                                                                          | 5.6                                                                             |
| Au mass fraction of the standard ( $C_{S\ RM}$ )                      | 0.1                                                                                  | < 0.0                                                                        | 0.1                                                                             |
| Sample uptake rate for the standard ( $q_{liq\ RM}$ )                 | 0.1                                                                                  | < 0.0                                                                        | 0.1                                                                             |
| Time of acquisition for the standard ( $t_{aq\ RM}$ )                 | < 0.0                                                                                | < 0.0                                                                        | < 0.0                                                                           |
| Number of observed events for the standard ( $N_{NP\ RM}$ )           | 1.9                                                                                  | 0.2                                                                          | 3.0                                                                             |
| Sample uptake rate for the sample ( $q_{liq}$ )                       | 0.1                                                                                  | < 0.0                                                                        | 0.1                                                                             |
| Time of acquisition for the sample ( $t_{aq}$ )                       | < 0.0                                                                                | < 0.0                                                                        | < 0.0                                                                           |
| Dilution Factor of stock suspension for the standard ( $Dil.F_{RM}$ ) | 1.1                                                                                  | < 0.0                                                                        | 0.1                                                                             |
| Particle size for the sample ( $d_{NP}$ )                             | 92.8                                                                                 | 96.3                                                                         | 89.0                                                                            |
| Au mass fraction of the sample ( $C_S$ )                              | 0.3                                                                                  | < 0.0                                                                        | 0.5                                                                             |
| Density of the particles ( $\rho$ )                                   | < 0.0                                                                                | < 0.0                                                                        | < 0.0                                                                           |
| Residual                                                              | 0.3                                                                                  | 3.0                                                                          | 0.3                                                                             |
| Combined standard uncertainty (%)                                     | 5.7 %                                                                                | 19.3 %                                                                       | 4.7 %                                                                           |
| Expanded k=2 uncertainty (%)                                          | 11.5 %                                                                               | 38.7 %                                                                       | 9.4 %                                                                           |

|                                                                       | <b>Reported<br/>diameter (ROI)</b><br><i>(PNC<sub>direct</sub>/PNC<sub>mean</sub>)</i> | <b>HR-SEM<br/>diameter</b><br><i>(PNC<sub>direct</sub>/PNC<sub>mean</sub>)</i> | <b>spICP-MS<br/>diameter</b><br><i>(PNC<sub>direct</sub>/PNC<sub>mean</sub>)</i> |
|-----------------------------------------------------------------------|----------------------------------------------------------------------------------------|--------------------------------------------------------------------------------|----------------------------------------------------------------------------------|
| <b>For NIST RM 8013:</b>                                              | <b>106.0 %</b>                                                                         | <b>102.7 %</b>                                                                 | <b>97.7 %</b>                                                                    |
| <b>Source of uncertainty</b>                                          | <b>Relative<br/>contribution<br/>(%)</b>                                               | <b>Relative<br/>contribution<br/>(%)</b>                                       | <b>Relative<br/>contribution<br/>(%)</b>                                         |
| Particle size consensus value for standard ( $d_{NP, RM}$ )           | 16.8                                                                                   | 0.6                                                                            | 0.1                                                                              |
| Dilution Factor of stock suspension for the sample ( $Dil.F$ )        | 0.2                                                                                    | < 0.0                                                                          | < 0.0                                                                            |
| Measurement repeatability ( $Rep$ )                                   | 1.5                                                                                    | 0.1                                                                            | < 0.0                                                                            |
| Number of observed events for the sample ( $N_{NP}$ )                 | 6.3                                                                                    | 0.2                                                                            | 0.1                                                                              |
| Au mass fraction of the standard ( $C_{S, RM}$ )                      | 0.1                                                                                    | < 0.0                                                                          | < 0.0                                                                            |
| Sample uptake rate for the standard ( $q_{liq, RM}$ )                 | 0.1                                                                                    | < 0.0                                                                          | < 0.0                                                                            |
| Time of acquisition for the standard ( $t_{aq, RM}$ )                 | < 0.0                                                                                  | < 0.0                                                                          | < 0.0                                                                            |
| Number of observed events for the standard ( $N_{NP, RM}$ )           | 12.3                                                                                   | 0.4                                                                            | 0.1                                                                              |
| Sample uptake rate for the sample ( $q_{liq}$ )                       | 0.1                                                                                    | < 0.0                                                                          | < 0.0                                                                            |
| Time of acquisition for the sample ( $t_{aq}$ )                       | < 0.0                                                                                  | < 0.0                                                                          | < 0.0                                                                            |
| Dilution Factor of stock suspension for the standard ( $Dil.F_{RM}$ ) | 0.4                                                                                    | < 0.0                                                                          | < 0.0                                                                            |
| Particle size for the sample ( $d_{NP}$ )                             | 51.2                                                                                   | 97.4                                                                           | 95.4                                                                             |
| Au mass fraction of the sample ( $C_S$ )                              | 10.7                                                                                   | 0.4                                                                            | 0.1                                                                              |
| Density of the particles ( $\rho$ )                                   | 0.1                                                                                    | < 0.0                                                                          | < 0.0                                                                            |
| Residual                                                              | 0.2                                                                                    | 0.9                                                                            | 4.2                                                                              |
| Combined standard uncertainty (%)                                     | 2.0 %                                                                                  | 10.5 %                                                                         | 22.2 %                                                                           |
| Expanded k=2 uncertainty (%)                                          | 4.0 %                                                                                  | 21.0 %                                                                         | 44.4 %                                                                           |

**Table S-9. Uncertainty budget for the calculation of  $PNC_{distribution}$  of NIST RM 8012 and RM 8013. Full particle size distribution reported by TEM (NIST ROIs)<sup>2,3</sup> (first column), HR-SEM<sup>1</sup> (second column), and spICP-MS<sup>1</sup> (third column) for NIST RMs were combined with Au mass fraction<sup>2,3</sup> to derive  $PNC_{distribution}$ .**

| <b>For NIST RM 8012:</b>                        |                                                                                                                        |                                                                                                                     |                                                                                                                       |
|-------------------------------------------------|------------------------------------------------------------------------------------------------------------------------|---------------------------------------------------------------------------------------------------------------------|-----------------------------------------------------------------------------------------------------------------------|
|                                                 | <b>TEM (ROI)</b><br><i>(<math>PNC_{distribution}</math>)</i><br><b><math>2.63 \times 10^{14} \text{ L}^{-1}</math></b> | <b>HR-SEM</b><br><i>(<math>PNC_{distribution}</math>)</i><br><b><math>2.47 \times 10^{14} \text{ L}^{-1}</math></b> | <b>spICP-MS</b><br><i>(<math>PNC_{distribution}</math>)</i><br><b><math>2.76 \times 10^{14} \text{ L}^{-1}</math></b> |
| <b>Source of uncertainty</b>                    | <b>Relative contribution (%)</b>                                                                                       | <b>Relative contribution (%)</b>                                                                                    | <b>Relative contribution (%)</b>                                                                                      |
| Au mass fraction of the material ( $C_S$ )      | 0.3                                                                                                                    | < 0.0                                                                                                               | 0.6                                                                                                                   |
| Particle size for the material ( $d_{NP, RM}$ ) | 95.3                                                                                                                   | 96.9                                                                                                                | 94.9                                                                                                                  |
| Density of the particles ( $\rho$ )             | < 0.0                                                                                                                  | < 0.0                                                                                                               | < 0.0                                                                                                                 |
| Spread of particle size distribution            | 4.1                                                                                                                    | < 0.0                                                                                                               | 4.2                                                                                                                   |
| Residual                                        | 0.3                                                                                                                    | 3.0                                                                                                                 | 0.3                                                                                                                   |
| Combined standard uncertainty ( $L^{-1}$ )      | $1.6 \times 10^{13} \text{ L}^{-1}$                                                                                    | $4.7 \times 10^{13} \text{ L}^{-1}$                                                                                 | $1.4 \times 10^{13} \text{ L}^{-1}$                                                                                   |
| Expanded k=2 uncertainty ( $L^{-1}$ )           | $3.1 \times 10^{13} \text{ L}^{-1}$                                                                                    | $9.4 \times 10^{13} \text{ L}^{-1}$                                                                                 | $2.9 \times 10^{13} \text{ L}^{-1}$                                                                                   |

| <b>For NIST RM 8013:</b>                        |                                                                                                                        |                                                                                                                     |                                                                                                                       |
|-------------------------------------------------|------------------------------------------------------------------------------------------------------------------------|---------------------------------------------------------------------------------------------------------------------|-----------------------------------------------------------------------------------------------------------------------|
|                                                 | <b>TEM (ROI)</b><br><i>(<math>PNC_{distribution}</math>)</i><br><b><math>3.10 \times 10^{13} \text{ L}^{-1}</math></b> | <b>HR-SEM</b><br><i>(<math>PNC_{distribution}</math>)</i><br><b><math>3.14 \times 10^{13} \text{ L}^{-1}</math></b> | <b>spICP-MS</b><br><i>(<math>PNC_{distribution}</math>)</i><br><b><math>3.37 \times 10^{13} \text{ L}^{-1}</math></b> |
| <b>Source of uncertainty</b>                    | <b>Relative contribution (%)</b>                                                                                       | <b>Relative contribution (%)</b>                                                                                    | <b>Relative contribution (%)</b>                                                                                      |
| Au mass fraction of the material ( $C_S$ )      | 11.7                                                                                                                   | 0.4                                                                                                                 | 0.1                                                                                                                   |
| Particle size for the material ( $d_{NP, RM}$ ) | 56.0                                                                                                                   | 98.6                                                                                                                | 95.7                                                                                                                  |
| Density of the particles ( $\rho$ )             | 0.1                                                                                                                    | < 0.0                                                                                                               | < 0.0                                                                                                                 |
| Spread of particle size distribution            | 32.3                                                                                                                   | 0.1                                                                                                                 | 0.1                                                                                                                   |
| Residual                                        | < 0.0                                                                                                                  | 0.9                                                                                                                 | 4.2                                                                                                                   |
| Combined standard uncertainty ( $L^{-1}$ )      | $0.07 \times 10^{13} \text{ L}^{-1}$                                                                                   | $0.31 \times 10^{13} \text{ L}^{-1}$                                                                                | $0.7 \times 10^{13} \text{ L}^{-1}$                                                                                   |
| Expanded k=2 uncertainty ( $L^{-1}$ )           | $0.13 \times 10^{13} \text{ L}^{-1}$                                                                                   | $0.62 \times 10^{13} \text{ L}^{-1}$                                                                                | $1.5 \times 10^{13} \text{ L}^{-1}$                                                                                   |

**Table S-10. Uncertainty budget for the ratio between  $PNC_{direct}$  obtained across 15 independent spICP-MS experiments, expressed in percentage, and  $PNC_{distribution}$  for RM 8012 and RM 8013.  $PNC_{distribution}$  values reported for purposes of comparison to  $PNC_{direct}$  were derived based on the combination of Au mass fraction and the full size distribution of particle diameters reported by TEM (NIST ROIs)<sup>2,3</sup> (first column), HR-SEM<sup>1</sup> (second column), and spICP-MS<sup>1</sup> (third column).**

| For NIST RM 8012:                                                     | TEM (ROI)                           | HR-SEM                              | spICP-MS                            |
|-----------------------------------------------------------------------|-------------------------------------|-------------------------------------|-------------------------------------|
|                                                                       | $(PNC_{direct}/PNC_{distribution})$ | $(PNC_{direct}/PNC_{distribution})$ | $(PNC_{direct}/PNC_{distribution})$ |
|                                                                       | 90.4 %                              | 96.5 %                              | 86.1 %                              |
| Source of uncertainty                                                 | Relative contribution (%)           | Relative contribution (%)           | Relative contribution (%)           |
| Particle size consensus value for standard ( $d_{NP\ RM}$ )           | 0.3                                 | < 0.0                               | 0.3                                 |
| Dilution Factor of stock suspension for the sample ( $Dil.F$ )        | 0.1                                 | < 0.0                               | 0.1                                 |
| Measurement repeatability ( $Rep$ )                                   | 0.4                                 | < 0.0                               | 0.5                                 |
| Number of observed events for the sample ( $N_{NP}$ )                 | 3.3                                 | 0.3                                 | 4.2                                 |
| Au mass fraction of the standard ( $C_{S\ RM}$ )                      | 0.1                                 | < 0.0                               | 0.1                                 |
| Sample uptake rate for the standard ( $q_{liq\ RM}$ )                 | < 0.0                               | < 0.0                               | < 0.0                               |
| Time of acquisition for the standard ( $t_{aq\ RM}$ )                 | < 0.0                               | < 0.0                               | < 0.0                               |
| Number of observed events for the standard ( $N_{NP\ RM}$ )           | 1.8                                 | 0.2                                 | 2.2                                 |
| Sample uptake rate for the sample ( $q_{liq}$ )                       | < 0.0                               | < 0.0                               | < 0.0                               |
| Time of acquisition for the sample ( $t_{aq}$ )                       | < 0.0                               | < 0.0                               | < 0.0                               |
| Dilution Factor of stock suspension for the standard ( $Dil.F_{RM}$ ) | 0.1                                 | 0.1                                 | 0.1                                 |
| Particle size for the sample ( $d_{NP}$ )                             | 89.5                                | 96.3                                | 87.7                                |
| Au mass fraction of the sample ( $C_S$ )                              | 0.3                                 | < 0.0                               | 0.5                                 |
| Density of the particles ( $\rho$ )                                   | < 0.0                               | < 0.0                               | < 0.0                               |
| Spread of the particle size distribution                              | 3.8                                 | < 0.0                               | 3.9                                 |
| Residual                                                              | 0.3                                 | 3.0                                 | 0.3                                 |
| Combined standard uncertainty (%)                                     | 5.5 %                               | 18.5 %                              | 4.7 %                               |
| Expanded k=2 uncertainty (%)                                          | N/A                                 | 37.0 %                              | 9.4 %                               |



| For NIST RM 8013:                                                     | TEM (ROI)                           | HR-SEM                              | spICP-MS                            |
|-----------------------------------------------------------------------|-------------------------------------|-------------------------------------|-------------------------------------|
|                                                                       | $(PNC_{direct}/PNC_{distribution})$ | $(PNC_{direct}/PNC_{distribution})$ | $(PNC_{direct}/PNC_{distribution})$ |
|                                                                       | 102.1 %                             | 100.8 %                             | 93.9 %                              |
| Source of uncertainty                                                 | Relative contribution (%)           | Relative contribution (%)           | Relative contribution (%)           |
| Particle size consensus value for standard ( $d_{NP RM}$ )            | 9.7                                 | 0.6                                 | 0.1                                 |
| Dilution Factor of stock suspension for the sample ( $Dil.F$ )        | 0.1                                 | < 0.0                               | < 0.0                               |
| Measurement repeatability ( $Rep$ )                                   | 0.8                                 | 0.1                                 | < 0.0                               |
| Number of observed events for the sample ( $N_{NP}$ )                 | 3.6                                 | 0.2                                 | 0.1                                 |
| Au mass fraction of the standard ( $C_{S RM}$ )                       | < 0.0                               | < 0.0                               | < 0.0                               |
| Sample uptake rate for the standard ( $q_{liq RM}$ )                  | 0.1                                 | < 0.0                               | < 0.0                               |
| Time of acquisition for the standard ( $t_{aq RM}$ )                  | < 0.0                               | < 0.0                               | < 0.0                               |
| Number of observed events for the standard ( $N_{NP RM}$ )            | 7.0                                 | 0.4                                 | 0.1                                 |
| Sample uptake rate for the sample ( $q_{liq}$ )                       | 0.1                                 | < 0.0                               | < 0.0                               |
| Time of acquisition for the sample ( $t_{aq}$ )                       | < 0.0                               | < 0.0                               | < 0.0                               |
| Dilution Factor of stock suspension for the standard ( $Dil.F_{RM}$ ) | 0.2                                 | < 0.0                               | < 0.0                               |
| Particle size for the sample ( $d_{NP}$ )                             | 43.8                                | 97.3                                | 95.4                                |
| Au mass fraction of the sample ( $C_S$ )                              | 9.1                                 | 0.4                                 | 0.1                                 |
| Density of the particles ( $\rho$ )                                   | < 0.0                               | < 0.0                               | < 0.0                               |
| Spread of the particle size distribution                              | 25.2                                | 0.1                                 | < 0.0                               |
| Residual                                                              | 0.1                                 | 0.9                                 | 4.2                                 |
| Combined standard uncertainty (%)                                     | 2.5%                                | 10.1 %                              | 20.8 %                              |
| Expanded k=2 uncertainty (%)                                          | N/A                                 | 20.1 %                              | 41.5 %                              |

**Table S-11. Huber estimates of particle size location (or central tendency) by spICP-MS simultaneously obtained with the PNC measurements and comparison with reference spICP-MS results previously published<sup>1</sup> for NIST RM 8012 and 8013, for different commercial AuNPs.**

|                                   | spICP-MS                | Difference vs Reference <sup>1</sup> |
|-----------------------------------|-------------------------|--------------------------------------|
| <b>RM 8012 (nm)</b>               | $26.9 \pm 0.07 (0.1)^a$ | -1.3 %                               |
| NPs analyzed                      | 51159                   |                                      |
| MAD (nm)                          | 2.0                     |                                      |
| <b>RM 8013 (nm)</b>               | $55.2 \pm 0.1 (0.3)^a$  | 2.0 %                                |
| NPs analyzed                      | 53247                   |                                      |
| MAD (nm)                          | 3.1                     |                                      |
| <b>30 nm PVP (nm)</b>             | $30.9 \pm 0.2 (0.6)^a$  | 3.1 %                                |
| NPs analyzed                      | 1791                    |                                      |
| MAD (nm)                          | 2.2                     |                                      |
| <b>30 nm bPEI (nm)</b>            | $31.5 \pm 0.2 (1.3)^a$  | 1.6 %                                |
| NPs analyzed                      | 1914                    |                                      |
| MAD (nm)                          | 3.4                     |                                      |
| <b>30 nm PEG (nm)</b>             | $30.7 \pm 0.1 (0.9)^a$  | 0.2 %                                |
| NPs analyzed                      | 2704                    |                                      |
| MAD (nm)                          | 2.9                     |                                      |
| <b>60 nm PVP (nm)</b>             | $60.8 \pm 0.4 (1.1)^a$  | 3.7 %                                |
| NPs analyzed                      | 1352                    |                                      |
| MAD (nm)                          | 8.2                     |                                      |
| <b>60 nm bPEI first lot (nm)</b>  | $60.7 \pm 0.3 (0.9)^a$  | 0.8 %                                |
| NPs analyzed                      | 4014                    |                                      |
| MAD (nm)                          | 9.4                     |                                      |
| <b>60 nm bPEI second lot (nm)</b> | $60.3 \pm 0.3 (1.0)^a$  | 2.6 %                                |
| NPs analyzed                      | 4565                    |                                      |
| MAD (nm)                          | 8.6                     |                                      |
| <b>60 nm PEG first lot (nm)</b>   | $55.9 \pm 0.3 (1.0)^a$  | -1.4 %                               |
| NPs analyzed                      | 3421                    |                                      |
| MAD (nm)                          | 8.6                     |                                      |

|                                  |                                   |       |
|----------------------------------|-----------------------------------|-------|
| <b>60 nm PEG second lot (nm)</b> | $60.5 \pm 0.3$ (3.) <sup>a</sup>  | 3.8 % |
| NPs analyzed                     | 3346                              |       |
| MAD (nm)                         | 8.1                               |       |
| <b>100 nm Citrate (nm)</b>       | $93.3 \pm 0.6$ (2.3) <sup>a</sup> | 0.1 % |
| NPs analyzed                     | 2820                              |       |
| MAD (nm)                         | 14.7                              |       |
| <b>100 nm PVP (nm)</b>           | $96.7 \pm 0.6$ (3.3) <sup>a</sup> | 1.2 % |
| NPs analyzed                     | 1891                              |       |
| MAD (nm)                         | 10.8                              |       |
| <b>100 nm bPEI (nm)</b>          | $94.9 \pm 0.5$ (2.0) <sup>a</sup> | 0.5 % |
| NPs analyzed                     | 2924                              |       |
| MAD (nm)                         | 11.2                              |       |
| <b>100 nm PEG (nm)</b>           | $99.9 \pm 0.7$ (3.0) <sup>a</sup> | 1.2 % |
| NPs analyzed                     | 2382                              |       |
| MAD (nm)                         | 14.9                              |       |

Values indicate the Huber estimates of particle size location, and the standard uncertainty associated with the Huber estimate.

<sup>a</sup>All the components affecting spICP-MS and HR-SEM size determinations were included in the parenthetical uncertainty computation.

---

**Table S-12. PNCs derived for NIST AuNP RMs using Au mass fraction reported in the NIST ROIs<sup>2,3</sup> and: Huber estimates of particle size location (or central tendency) (first column), and the full particle size distribution (second column) simultaneously measured by spICP-MS across 15 independent experiments.**

|                       | Central Tendency ( $PNC_{mean}$ ) <sup>a</sup>               | Full PSD ( $PNC_{distribution}$ )                            |
|-----------------------|--------------------------------------------------------------|--------------------------------------------------------------|
| <b>RM 8012</b>        |                                                              |                                                              |
| spICP-MS <sup>b</sup> | $2.46 \times 10^{14} \pm 0.04 \times 10^{14} \text{ L}^{-1}$ | $2.74 \times 10^{14} \pm 0.12 \times 10^{14} \text{ L}^{-1}$ |
| <b>RM 8013</b>        |                                                              |                                                              |
| spICP-MS <sup>b</sup> | $3.04 \times 10^{13} \pm 0.06 \times 10^{13} \text{ L}^{-1}$ | $3.35 \times 10^{13} \pm 0.07 \times 10^{13} \text{ L}^{-1}$ |

<sup>a</sup> Assumes all analyte is present as spherical NPs of the central tendency diameter.  
<sup>b</sup> Expanded uncertainties associated with the spICP-MS size determinations included a best estimate of known or suspected sources of bias. Listed uncertainties are based on a confidence interval, with the coverage factor,  $k = 2$  corresponding to approximately 95 % confidence.

**Table S-13. Uncertainty budget for the calculation of  $PNC_{mean}$  of NIST RM 8012 and RM 8013 derived based on the combination of Au mass fraction<sup>2,3</sup> and the Huber estimates of particle size (or central tendency) results simultaneously obtained by spICP-MS in this study.**

| <b>For NIST RM 8012:</b>                        |                                  | <b>spICP-MS simultaneous<br/>(<math>PNC_{mean} 2.46 \times 10^{14} L^{-1}</math>)</b> |
|-------------------------------------------------|----------------------------------|---------------------------------------------------------------------------------------|
| <b>Source of uncertainty</b>                    | <b>Relative contribution (%)</b> |                                                                                       |
| Au mass fraction of the material ( $C_S$ )      | 17.3                             |                                                                                       |
| Particle size for the material ( $d_{NP\ RM}$ ) | 82.3                             |                                                                                       |
| Density of the particles ( $\rho$ )             | 0.4                              |                                                                                       |
| Residual                                        | < 0.0                            |                                                                                       |
| Combined standard uncertainty ( $L^{-1}$ )      | $0.2 \times 10^{13} L^{-1}$      |                                                                                       |
| Expanded k=2 uncertainty ( $L^{-1}$ )           | $0.4 \times 10^{13} L^{-1}$      |                                                                                       |

| <b>For NIST RM 8013:</b>                        |                                  | <b>spICP-MS simultaneous<br/>(<math>PNC_{mean} 3.04 \times 10^{13} L^{-1}</math>)</b> |
|-------------------------------------------------|----------------------------------|---------------------------------------------------------------------------------------|
| <b>Source of uncertainty</b>                    | <b>Relative contribution (%)</b> |                                                                                       |
| Au mass fraction of the material ( $C_S$ )      | 45.1                             |                                                                                       |
| Particle size for the material ( $d_{NP\ RM}$ ) | 54.6                             |                                                                                       |
| Density of the particles ( $\rho$ )             | 0.3                              |                                                                                       |
| Residual                                        | < 0.0                            |                                                                                       |
| Combined standard uncertainty ( $L^{-1}$ )      | $0.3 \times 10^{12} L^{-1}$      |                                                                                       |
| Expanded k=2 uncertainty ( $L^{-1}$ )           | $0.6 \times 10^{12} L^{-1}$      |                                                                                       |

**Table S-14. Uncertainty budget for the ratio between  $PNC_{direct}$  obtained across 15 independent spICP-MS experiments, expressed in percentage, and  $PNC_{mean}$  for RM 8012 and RM 8013.  $PNC_{mean}$  values reported for purposes of comparison to  $PNC_{direct}$  were derived based on the combination of Au mass fraction and the Huber estimates of particle size (or central tendency) results simultaneously obtained by spICP-MS in this study.**

|                                                                       | <b>RM 8012</b><br><i>(<math>PNC_{direct}/PNC_{mean}</math>)</i><br><b>96.9 %</b> | <b>RM 8013</b><br><i>(<math>PNC_{direct}/PNC_{mean}</math>)</i><br><b>103.9 %</b> |
|-----------------------------------------------------------------------|----------------------------------------------------------------------------------|-----------------------------------------------------------------------------------|
| <b>Source of uncertainty</b>                                          | <b>Relative contribution (%)</b>                                                 | <b>Relative contribution (%)</b>                                                  |
| Particle size consensus value for standard ( $d_{NP\ RM}$ )           | 3.3                                                                              | 27.3                                                                              |
| Dilution Factor of stock suspension for the sample ( $Dil.F$ )        | 1.4                                                                              | 0.4                                                                               |
| Measurement repeatability ( $Rep$ )                                   | 5.1                                                                              | 2.4                                                                               |
| Number of observed events for the sample ( $N_{NP}$ )                 | 42.4                                                                             | 10.3                                                                              |
| Au mass fraction of the standard ( $C_{S\ RM}$ )                      | 0.7                                                                              | 0.1                                                                               |
| Sample uptake rate for the standard ( $q_{liq\ RM}$ )                 | 0.4                                                                              | 0.2                                                                               |
| Time of acquisition for the standard ( $t_{aq\ RM}$ )                 | < 0.0                                                                            | < 0.0                                                                             |
| Number of observed events for the standard ( $N_{NP\ RM}$ )           | 22.4                                                                             | 19.9                                                                              |
| Sample uptake rate for the sample ( $q_{liq}$ )                       | 0.4                                                                              | 0.2                                                                               |
| Time of acquisition for the sample ( $t_{aq}$ )                       | < 0.0                                                                            | < 0.0                                                                             |
| Dilution Factor of stock suspension for the standard ( $Dil.F_{RM}$ ) | 0.8                                                                              | 0.6                                                                               |
| Particle size for the sample ( $d_{NP}$ )                             | 18.8                                                                             | 20.9                                                                              |
| Au mass fraction of the sample ( $C_S$ )                              | 4.0                                                                              | 17.2                                                                              |
| Density of the particles ( $\rho$ )                                   | 0.1                                                                              | 0.1                                                                               |
| Residual                                                              | 0.2                                                                              | 0.3                                                                               |
| Combined standard uncertainty (%)                                     | 1.7 %                                                                            | 1.5 %                                                                             |
| Expanded k=2 uncertainty (%)                                          | 3.3 %                                                                            | 3.1 %                                                                             |

**Table S-15. Uncertainty budget for the calculation of  $PNC_{distribution}$  of NIST RM 8012 and RM 8013 derived based on the combination of Au mass fraction<sup>2,3</sup> and a representative full particle size distribution simultaneously obtained by spICP-MS in this study.**

|                                                   | <b>RM 8012</b><br><i>(<math>PNC_{distribution}</math><br/><math>2.74 \times 10^{14} \text{ L}^{-1}</math>)</i> | <b>RM 8013</b><br><i>(<math>PNC_{distribution}</math><br/><math>3.35 \times 10^{13} \text{ L}^{-1}</math>)</i> |
|---------------------------------------------------|----------------------------------------------------------------------------------------------------------------|----------------------------------------------------------------------------------------------------------------|
| <b>Source of uncertainty</b>                      | <b>Relative contribution (%)</b>                                                                               | <b>Relative contribution (%)</b>                                                                               |
| Au mass fraction of the material ( $C_S$ )        | 14.0                                                                                                           | 44.8                                                                                                           |
| Particle size for the material ( $d_{NP, RM}$ )   | 66.5                                                                                                           | 54.3                                                                                                           |
| Density of the particles ( $\rho$ )               | 0.3                                                                                                            | 0.3                                                                                                            |
| Spread of particle size distribution              | 19.2                                                                                                           | 0.5                                                                                                            |
| Residual                                          | < 0.0                                                                                                          | < 0.0                                                                                                          |
| Combined standard uncertainty ( $\text{L}^{-1}$ ) | $0.6 \times 10^{13} \text{ L}^{-1}$                                                                            | $0.2 \times 10^{12} \text{ L}^{-1}$                                                                            |
| Expanded k=2 uncertainty ( $\text{L}^{-1}$ )      | $1.2 \times 10^{13} \text{ L}^{-1}$                                                                            | $0.7 \times 10^{12} \text{ L}^{-1}$                                                                            |

**Table S-16. Uncertainty budget for the ratio between  $PNC_{direct}$ , obtained across 15 independent spICP-MS experiments, expressed in percentage, and  $PNC_{distribution}$  for RM 8012 and RM 8013.  $PNC_{distribution}$  values reported for purposes of comparison to  $PNC_{direct}$  were derived based on the combination of Au mass fraction<sup>2,3</sup> and a representative full particle size distribution simultaneously obtained by spICP-MS in this study.**

|                                                                       | <b>RM 8012</b><br><i>(<math>PNC_{direct}/PNC_{distribution}</math>)</i><br><b>87.0 %</b> | <b>RM 8013</b><br><i>(<math>PNC_{direct}/PNC_{distribution}</math>)</i><br><b>94.4 %</b> |
|-----------------------------------------------------------------------|------------------------------------------------------------------------------------------|------------------------------------------------------------------------------------------|
| <b>Source of uncertainty</b>                                          | <b>Relative contribution (%)</b>                                                         | <b>Relative contribution (%)</b>                                                         |
| Particle size consensus value for standard ( $d_{NP\ RM}$ )           | 1.3                                                                                      | 23.2                                                                                     |
| Dilution Factor of stock suspension for the sample ( $Dil.F$ )        | 0.6                                                                                      | 0.3                                                                                      |
| Measurement repeatability ( $Rep$ )                                   | 2.1                                                                                      | 2.0                                                                                      |
| Number of observed events for the sample ( $N_{NP}$ )                 | 17.4                                                                                     | 8.7                                                                                      |
| Au mass fraction of the standard ( $C_{S\ RM}$ )                      | 0.3                                                                                      | 0.1                                                                                      |
| Sample uptake rate for the standard ( $q_{liq\ RM}$ )                 | 0.2                                                                                      | 0.2                                                                                      |
| Time of acquisition for the standard ( $t_{aq\ RM}$ )                 | < 0.0                                                                                    | < 0.0                                                                                    |
| Number of observed events for the standard ( $N_{NP\ RM}$ )           | 9.2                                                                                      | 16.9                                                                                     |
| Sample uptake rate for the sample ( $q_{liq}$ )                       | 0.2                                                                                      | 0.2                                                                                      |
| Time of acquisition for the sample ( $t_{aq}$ )                       | < 0.0                                                                                    | < 0.0                                                                                    |
| Dilution Factor of stock suspension for the standard ( $Dil.F_{RM}$ ) | 0.3                                                                                      | 0.5                                                                                      |
| Particle size for the sample ( $d_{NP}$ )                             | 45.5                                                                                     | 25.8                                                                                     |
| Au mass fraction of the sample ( $C_S$ )                              | 9.6                                                                                      | 21.3                                                                                     |
| Density of the particles ( $\rho$ )                                   | 0.2                                                                                      | 0.2                                                                                      |
| Spread of the particle size distribution                              | 13.1                                                                                     | 0.2                                                                                      |
| Residual                                                              | 0.1                                                                                      | 0.3                                                                                      |
| Combined standard uncertainty (%)                                     | 2.3 %                                                                                    | 1.5 %                                                                                    |
| Expanded k=2 uncertainty (%)                                          | 4.6 %                                                                                    | 3.0 %                                                                                    |



**Table S-17. Average uncertainty budget for spICP-MS determination of  $PNC_{direct}$  of 30 nm, 60 nm, and 100 nm commercial AuNPs, respectively, using NIST RM 8013 as the calibration standard.**

|                                                                  | <b>30 nm AuNPs</b><br>( $\text{Av } PNC_{direct}$<br>$2.13 \times 10^{14} \text{ L}^{-1}$ ) | <b>60 nm AuNPs</b><br>( $\text{Av } PNC_{direct}$<br>$2.72 \times 10^{13} \text{ L}^{-1}$ ) | <b>100 nm AuNPs</b><br>( $\text{Av } PNC_{direct}$<br>$5.42 \times 10^{12} \text{ L}^{-1}$ ) |
|------------------------------------------------------------------|---------------------------------------------------------------------------------------------|---------------------------------------------------------------------------------------------|----------------------------------------------------------------------------------------------|
| <b>Source of uncertainty</b>                                     | <b>Relative contribution (%)</b>                                                            | <b>Relative contribution (%)</b>                                                            | <b>Relative contribution (%)</b>                                                             |
| Particle size consensus value for RM 8013 ( $d_{NP\ RM}$ )       | 5.9                                                                                         | 5.0                                                                                         | 5.1                                                                                          |
| Dilution Factor of stock suspension for the sample ( $Dil.F$ )   | 10.2                                                                                        | 2.1                                                                                         | 9.8                                                                                          |
| Measurement repeatability ( $Rep$ )                              | 9.2                                                                                         | 7.9                                                                                         | 8.0                                                                                          |
| Number of observed events for the sample ( $N_{NP}$ )            | 36.8                                                                                        | 25.5                                                                                        | 38.8                                                                                         |
| Au mass fraction of RM 8013 ( $C_S$ )                            | 1.2                                                                                         | 1.0                                                                                         | 1.0                                                                                          |
| Sample uptake rate for RM 8013 ( $q_{liq\ RM}$ )                 | 0.9                                                                                         | 0.7                                                                                         | 0.7                                                                                          |
| Time of acquisition for RM 8013 ( $t_{aq\ RM}$ )                 | < 0.0                                                                                       | < 0.0                                                                                       | < 0.0                                                                                        |
| Number of observed events for RM8013 ( $N_{NP\ RM}$ )            | 29.8                                                                                        | 52.0                                                                                        | 26.1                                                                                         |
| Sample uptake rate for the sample ( $q_{liq}$ )                  | 0.9                                                                                         | 0.7                                                                                         | 0.7                                                                                          |
| Time of acquisition for the sample ( $t_{aq}$ )                  | < 0.0                                                                                       | < 0.0                                                                                       | < 0.0                                                                                        |
| Dilution Factor of stock suspension for RM 8013 ( $Dil.F_{RM}$ ) | 5.0                                                                                         | 4.6                                                                                         | 10.1                                                                                         |
| Density of the particles ( $\rho$ )                              | < 0.0                                                                                       | < 0.0                                                                                       | < 0.0                                                                                        |
| Residual                                                         | 0.2                                                                                         | 0.4                                                                                         | 0.2                                                                                          |
| Combined standard uncertainty ( $L^{-1}$ )                       | $1.0 \times 10^{13} \text{ L}^{-1}$                                                         | $0.8 \times 10^{12} \text{ L}^{-1}$                                                         | $2.1 \times 10^{11} \text{ L}^{-1}$                                                          |
| Expanded k=2 uncertainty ( $L^{-1}$ )                            | $2.9 \times 10^{13} \text{ L}^{-1}$                                                         | $3.5 \times 10^{12} \text{ L}^{-1}$                                                         | $6.6 \times 10^{11} \text{ L}^{-1}$                                                          |

**Table S-18. Total Au mass fraction provided by the supplier,<sup>16</sup> and in-house measurements for different commercial AuNPs analyzed in this study.**

|                              | Supplier Au mass fraction | In-house Au mass fraction |
|------------------------------|---------------------------|---------------------------|
| <b>30 nm PVP</b>             | 50                        | 61.65 ± 3.67              |
| <b>30 nm bPEI</b>            | 52                        | 62.07 ± 2.23              |
| <b>30 nm PEG</b>             | 51                        | 57.45 ± 1.45              |
| <b>60 nm PVP</b>             | 54                        | 59.66 ± 3.90              |
| <b>60 nm bPEI first lot</b>  | 52                        | 59.77 ± 6.19              |
| <b>60 nm bPEI second lot</b> | 53                        | 63.68 ± 1.04              |
| <b>60 nm PEG first lot</b>   | 53                        | 57.26 ± 0.49              |
| <b>60 nm PEG second lot</b>  | 50                        | 56.97 ± 0.76              |
| <b>100 nm Citrate</b>        | 52                        | 51.47 ± 2.66              |
| <b>100 nm PVP</b>            | 52                        | 44.30 ± 1.56              |
| <b>100 nm bPEI</b>           | 52                        | 41.92 ± 3.49              |
| <b>100 nm PEG</b>            | 54                        | 59.18 ± 0.82              |

Values indicate the mean and 1 SD, n=3

**Table S-19. PNCs derived for different commercial AuNPs based on the combination of Au mass fraction with: (first column) the Huber estimates of particle size location (or central tendency), and the full particle size distribution reported by TEM (second column) (supplier),<sup>16</sup> HR-SEM,<sup>1</sup> and spICP-MS.<sup>1</sup> Note that PNCs derived from the combination of Au mass fraction with TEM size provided by the supplier were reported in the first row for each material, while in-house Au mass fraction determinations were used for the remainder rows.**

|                                            | Central Tendency ( $PNC_{mean}$ ) <sup>a</sup>       | Full PSD ( $PNC_{distribution}$ )                      |
|--------------------------------------------|------------------------------------------------------|--------------------------------------------------------|
| <b>30 nm PVP</b>                           |                                                      |                                                        |
| TEM + Au mass fraction (supplier)          | $1.87 \times 10^{14} \pm 0.24 \times 10^{14} L^{-1}$ | $2.00 \times 10^{14} \pm 0.30 \times 10^{14} L^{-1} c$ |
| TEM (supplier) + in-house Au mass fraction | $2.31 \times 10^{14} \pm 0.33 \times 10^{14} L^{-1}$ | $2.47 \times 10^{14} \pm 0.40 \times 10^{14} L^{-1} c$ |
| HR-SEM <sup>b</sup>                        | $2.38 \times 10^{14} \pm 0.84 \times 10^{14} L^{-1}$ | $2.69 \times 10^{14} \pm 0.95 \times 10^{14} L^{-1}$   |
| spICP-MS <sup>b</sup>                      | $2.26 \times 10^{14} \pm 0.30 \times 10^{14} L^{-1}$ | $2.75 \times 10^{14} \pm 0.41 \times 10^{14} L^{-1}$   |
| <b>30 nm bPEI</b>                          |                                                      |                                                        |
| TEM + Au mass fraction (supplier)          | $1.76 \times 10^{14} \pm 0.27 \times 10^{14} L^{-1}$ | $1.84 \times 10^{14} \pm 0.30 \times 10^{14} L^{-1} c$ |
| TEM (supplier) + in-house Au mass fraction | $2.10 \times 10^{14} \pm 0.29 \times 10^{14} L^{-1}$ | $2.19 \times 10^{14} \pm 0.33 \times 10^{14} L^{-1} c$ |
| HR-SEM <sup>b</sup>                        | $1.97 \times 10^{14} \pm 0.65 \times 10^{14} L^{-1}$ | $2.48 \times 10^{14} \pm 0.82 \times 10^{14} L^{-1}$   |
| spICP-MS <sup>b</sup>                      | $2.06 \times 10^{14} \pm 0.19 \times 10^{14} L^{-1}$ | $2.54 \times 10^{14} \pm 0.29 \times 10^{14} L^{-1}$   |
| <b>30 nm PEG</b>                           |                                                      |                                                        |
| TEM + Au mass fraction (supplier)          | $1.46 \times 10^{14} \pm 0.21 \times 10^{14} L^{-1}$ | $1.56 \times 10^{14} \pm 0.24 \times 10^{14} L^{-1} c$ |
| TEM (supplier) + in-house Au mass fraction | $1.64 \times 10^{14} \pm 0.20 \times 10^{14} L^{-1}$ | $1.75 \times 10^{14} \pm 0.24 \times 10^{14} L^{-1} c$ |
| HR-SEM <sup>b</sup>                        | $2.13 \times 10^{14} \pm 0.71 \times 10^{14} L^{-1}$ | $2.46 \times 10^{14} \pm 0.82 \times 10^{14} L^{-1}$   |
| spICP-MS <sup>b</sup>                      | $1.98 \times 10^{14} \pm 0.17 \times 10^{14} L^{-1}$ | $2.49 \times 10^{14} \pm 0.25 \times 10^{14} L^{-1}$   |
| <b>60 nm PVP</b>                           |                                                      |                                                        |
| TEM + Au mass fraction (supplier)          | $2.99 \times 10^{13} \pm 0.59 \times 10^{13} L^{-1}$ | $3.54 \times 10^{13} \pm 0.81 \times 10^{13} L^{-1} c$ |
| TEM (supplier) + in-house Au mass fraction | $3.31 \times 10^{13} \pm 0.70 \times 10^{13} L^{-1}$ | $3.91 \times 10^{13} \pm 0.94 \times 10^{13} L^{-1} c$ |
| HR-SEM <sup>b</sup>                        | $2.79 \times 10^{13} \pm 0.63 \times 10^{13} L^{-1}$ | $3.30 \times 10^{13} \pm 0.75 \times 10^{13} L^{-1}$   |
| spICP-MS <sup>b</sup>                      | $2.93 \times 10^{13} \pm 0.40 \times 10^{13} L^{-1}$ | $3.52 \times 10^{13} \pm 0.49 \times 10^{13} L^{-1}$   |
| <b>60 nm bPEI first lot</b>                |                                                      |                                                        |

|                                            |                                                             |                                                                       |
|--------------------------------------------|-------------------------------------------------------------|-----------------------------------------------------------------------|
| TEM + Au mass fraction (supplier)          | $1.93 \times 10^{13} \pm 0.33 \times 10^{13} \text{L}^{-1}$ | $2.19 \times 10^{13} \pm 0.42 \times 10^{13} \text{L}^{-1} \text{ c}$ |
| TEM (supplier) + in-house Au mass fraction | $2.21 \times 10^{13} \pm 0.55 \times 10^{13} \text{L}^{-1}$ | $2.52 \times 10^{13} \pm 0.67 \times 10^{13} \text{L}^{-1} \text{ c}$ |
| HR-SEM <sup>b</sup>                        | $2.69 \times 10^{13} \pm 0.74 \times 10^{13} \text{L}^{-1}$ | $2.97 \times 10^{13} \pm 0.81 \times 10^{13} \text{L}^{-1}$           |
| spICP-MS <sup>b</sup>                      | $2.71 \times 10^{13} \pm 0.57 \times 10^{13} \text{L}^{-1}$ | $3.04 \times 10^{13} \pm 0.64 \times 10^{13} \text{L}^{-1}$           |
| <b>60 nm bPEI second lot</b>               |                                                             |                                                                       |
| TEM + Au mass fraction (supplier)          | $2.24 \times 10^{13} \pm 0.38 \times 10^{13} \text{L}^{-1}$ | $2.47 \times 10^{13} \pm 0.45 \times 10^{13} \text{L}^{-1} \text{ c}$ |
| TEM (supplier) + in-house Au mass fraction | $2.70 \times 10^{13} \pm 0.37 \times 10^{13} \text{L}^{-1}$ | $2.96 \times 10^{13} \pm 0.46 \times 10^{13} \text{L}^{-1} \text{ c}$ |
| HR-SEM <sup>b</sup>                        | $3.08 \times 10^{13} \pm 0.57 \times 10^{13} \text{L}^{-1}$ | $3.38 \times 10^{13} \pm 0.63 \times 10^{13} \text{L}^{-1}$           |
| spICP-MS <sup>b</sup>                      | $3.10 \times 10^{13} \pm 0.21 \times 10^{13} \text{L}^{-1}$ | $3.59 \times 10^{13} \pm 0.25 \times 10^{13} \text{L}^{-1}$           |
| <b>60 nm PEG first lot</b>                 |                                                             |                                                                       |
| TEM + Au mass fraction (supplier)          | $1.87 \times 10^{13} \pm 0.33 \times 10^{13} \text{L}^{-1}$ | $2.09 \times 10^{13} \pm 0.41 \times 10^{13} \text{L}^{-1} \text{ c}$ |
| TEM (supplier) + in-house Au mass fraction | $2.02 \times 10^{13} \pm 0.30 \times 10^{13} \text{L}^{-1}$ | $2.26 \times 10^{13} \pm 0.39 \times 10^{13} \text{L}^{-1} \text{ c}$ |
| HR-SEM <sup>b</sup>                        | $2.94 \times 10^{13} \pm 0.55 \times 10^{13} \text{L}^{-1}$ | $3.83 \times 10^{13} \pm 0.82 \times 10^{13} \text{L}^{-1}$           |
| spICP-MS <sup>b</sup>                      | $3.11 \times 10^{13} \pm 0.14 \times 10^{13} \text{L}^{-1}$ | $3.66 \times 10^{13} \pm 0.19 \times 10^{13} \text{L}^{-1}$           |
| <b>60 nm PEG second lot</b>                |                                                             |                                                                       |
| TEM + Au mass fraction (supplier)          | $1.84 \times 10^{13} \pm 0.31 \times 10^{13} \text{L}^{-1}$ | $2.04 \times 10^{13} \pm 0.38 \times 10^{13} \text{L}^{-1} \text{ c}$ |
| TEM (supplier) + in-house Au mass fraction | $2.09 \times 10^{13} \pm 0.29 \times 10^{13} \text{L}^{-1}$ | $2.33 \times 10^{13} \pm 0.38 \times 10^{13} \text{L}^{-1} \text{ c}$ |
| HR-SEM <sup>b</sup>                        | $2.65 \times 10^{13} \pm 0.49 \times 10^{13} \text{L}^{-1}$ | $3.07 \times 10^{13} \pm 0.57 \times 10^{13} \text{L}^{-1}$           |
| spICP-MS <sup>b</sup>                      | $2.85 \times 10^{13} \pm 0.43 \times 10^{13} \text{L}^{-1}$ | $3.26 \times 10^{13} \pm 0.50 \times 10^{13} \text{L}^{-1}$           |
| <b>100 nm Citrate</b>                      |                                                             |                                                                       |
| TEM + Au mass fraction (supplier)          | $4.44 \times 10^{12} \pm 0.79 \times 10^{12} \text{L}^{-1}$ | $5.09 \times 10^{12} \pm 1.02 \times 10^{12} \text{L}^{-1} \text{ c}$ |
| TEM (supplier) + in-house Au mass fraction | $4.40 \times 10^{12} \pm 0.79 \times 10^{12} \text{L}^{-1}$ | $5.03 \times 10^{12} \pm 1.02 \times 10^{12} \text{L}^{-1} \text{ c}$ |
| HR-SEM <sup>b</sup>                        | $5.28 \times 10^{12} \pm 0.90 \times 10^{12} \text{L}^{-1}$ | $6.24 \times 10^{12} \pm 1.07 \times 10^{12} \text{L}^{-1}$           |
| spICP-MS <sup>b</sup>                      | $6.29 \times 10^{12} \pm 0.76 \times 10^{12} \text{L}^{-1}$ | $7.45 \times 10^{12} \pm 0.92 \times 10^{12} \text{L}^{-1}$           |
| <b>100 nm PVP</b>                          |                                                             |                                                                       |
| TEM + Au mass fraction (supplier)          | $5.11 \times 10^{12} \pm 0.66 \times 10^{12} \text{L}^{-1}$ | $5.33 \times 10^{12} \pm 0.74 \times 10^{12} \text{L}^{-1} \text{ c}$ |
| TEM (supplier) + in-house Au mass fraction | $4.36 \times 10^{12} \pm 0.47 \times 10^{12} \text{L}^{-1}$ | $4.54 \times 10^{12} \pm 0.54 \times 10^{12} \text{L}^{-1} \text{ c}$ |
| HR-SEM <sup>b</sup>                        | $5.03 \times 10^{12} \pm 0.77 \times 10^{12} \text{L}^{-1}$ | $5.51 \times 10^{12} \pm 0.84 \times 10^{12} \text{L}^{-1}$           |
| spICP-MS <sup>b</sup>                      | $5.03 \times 10^{12} \pm 0.65 \times 10^{12} \text{L}^{-1}$ | $6.34 \times 10^{12} \pm 0.86 \times 10^{12} \text{L}^{-1}$           |
| <b>100 nm bPEI</b>                         |                                                             |                                                                       |

|                                            |                                                             |                                                                         |
|--------------------------------------------|-------------------------------------------------------------|-------------------------------------------------------------------------|
| TEM + Au mass fraction (supplier)          | $5.28 \times 10^{12} \pm 0.87 \times 10^{12} \text{L}^{-1}$ | $5.90 \times 10^{12} \pm 1.08 \times 10^{12} \text{L}^{-1} \text{ } ^c$ |
| TEM (supplier) + in-house Au mass fraction | $4.26 \times 10^{12} \pm 0.90 \times 10^{12} \text{L}^{-1}$ | $4.76 \times 10^{12} \pm 1.07 \times 10^{12} \text{L}^{-1} \text{ } ^c$ |
| HR-SEM <sup>b</sup>                        | $4.71 \times 10^{12} \pm 0.98 \times 10^{12} \text{L}^{-1}$ | $5.47 \times 10^{12} \pm 1.14 \times 10^{12} \text{L}^{-1}$             |
| spICP-MS <sup>b</sup>                      | $4.94 \times 10^{12} \pm 0.90 \times 10^{12} \text{L}^{-1}$ | $5.65 \times 10^{12} \pm 1.04 \times 10^{12} \text{L}^{-1}$             |

### 100 nm PEG

|                                            |                                                             |                                                                         |
|--------------------------------------------|-------------------------------------------------------------|-------------------------------------------------------------------------|
| TEM + Au mass fraction (supplier)          | $4.55 \times 10^{12} \pm 0.85 \times 10^{12} \text{L}^{-1}$ | $5.51 \times 10^{12} \pm 1.27 \times 10^{12} \text{L}^{-1} \text{ } ^c$ |
| TEM (supplier) + in-house Au mass fraction | $4.99 \times 10^{12} \pm 0.80 \times 10^{12} \text{L}^{-1}$ | $6.04 \times 10^{12} \pm 1.26 \times 10^{12} \text{L}^{-1} \text{ } ^c$ |
| HR-SEM <sup>b</sup>                        | $6.96 \times 10^{12} \pm 0.98 \times 10^{12} \text{L}^{-1}$ | $7.87 \times 10^{12} \pm 1.12 \times 10^{12} \text{L}^{-1}$             |
| spICP-MS <sup>b</sup>                      | $6.07 \times 10^{12} \pm 0.71 \times 10^{12} \text{L}^{-1}$ | $7.22 \times 10^{12} \pm 0.86 \times 10^{12} \text{L}^{-1}$             |

<sup>a</sup> Assumes all analyte is present as spherical NPs of the central tendency diameter.

<sup>b</sup> Expanded uncertainties associated with the spICP-MS and HR-SEM size determinations included a best estimate of known or suspected sources of bias.<sup>1</sup>

<sup>c</sup> PNC derived from the full particle size distribution obtained by TEM (supplier).<sup>16</sup>

Listed uncertainties are based on a confidence interval, with the coverage factor,  $k = 2$  corresponding to approximately 95 % confidence.

---

**Table S-20. Average uncertainty budget for the calculation of  $PNC_{mean}$  of 30 nm, 60 nm, and 100 nm commercial AuNPs, respectively. The Huber estimates of particle size (or central tendency) reported by TEM<sup>16</sup> (supplier) (first column), HR-SEM<sup>1</sup> (second column), and spICP-MS<sup>1</sup> (third column) were combined with in-house Au mass fraction determinations to derive  $PNC_{mean}$ .**

| <b>For 30 nm AuNPs:</b>                           |                                                                                                         |                                                                                                 |                                                                                                   |
|---------------------------------------------------|---------------------------------------------------------------------------------------------------------|-------------------------------------------------------------------------------------------------|---------------------------------------------------------------------------------------------------|
|                                                   | <b>TEM (Supplier)<br/>(<math>PNC_{mean}</math><br/><math>2.02 \times 10^{14} \text{ L}^{-1}</math>)</b> | <b>HR-SEM<br/>(<math>PNC_{mean}</math><br/><math>2.16 \times 10^{14} \text{ L}^{-1}</math>)</b> | <b>spICP-MS<br/>(<math>PNC_{mean}</math><br/><math>2.10 \times 10^{14} \text{ L}^{-1}</math>)</b> |
| <b>Source of uncertainty</b>                      | <b>Relative contribution (%)</b>                                                                        | <b>Relative contribution (%)</b>                                                                | <b>Relative contribution (%)</b>                                                                  |
| Au mass fraction of the material ( $C_S$ )        | 37.7                                                                                                    | 6.2                                                                                             | 58.4                                                                                              |
| Particle size for the material ( $d_{NP}$ )       | 62.0                                                                                                    | 91.5                                                                                            | 41.5                                                                                              |
| Density of the particles ( $\rho$ )               | < 0.0                                                                                                   | < 0.0                                                                                           | < 0.0                                                                                             |
| Residual                                          | 0.3                                                                                                     | 2.4                                                                                             | 0.1                                                                                               |
| Combined standard uncertainty ( $\text{L}^{-1}$ ) | $1.4 \times 10^{13} \text{ L}^{-1}$                                                                     | $3.6 \times 10^{13} \text{ L}^{-1}$                                                             | $1.1 \times 10^{13} \text{ L}^{-1}$                                                               |
| Expanded k=2 uncertainty ( $\text{L}^{-1}$ )      | $2.7 \times 10^{13} \text{ L}^{-1}$                                                                     | $7.3 \times 10^{13} \text{ L}^{-1}$                                                             | $2.2 \times 10^{13} \text{ L}^{-1}$                                                               |

| <b>For 60 nm AuNPs:</b>                           |                                                                                                         |                                                                                                 |                                                                                                   |
|---------------------------------------------------|---------------------------------------------------------------------------------------------------------|-------------------------------------------------------------------------------------------------|---------------------------------------------------------------------------------------------------|
|                                                   | <b>TEM (Supplier)<br/>(<math>PNC_{mean}</math><br/><math>2.47 \times 10^{13} \text{ L}^{-1}</math>)</b> | <b>HR-SEM<br/>(<math>PNC_{mean}</math><br/><math>2.83 \times 10^{13} \text{ L}^{-1}</math>)</b> | <b>spICP-MS<br/>(<math>PNC_{mean}</math><br/><math>2.94 \times 10^{13} \text{ L}^{-1}</math>)</b> |
| <b>Source of uncertainty</b>                      | <b>Relative contribution (%)</b>                                                                        | <b>Relative contribution (%)</b>                                                                | <b>Relative contribution (%)</b>                                                                  |
| Au mass fraction of the material ( $C_S$ )        | 23.0                                                                                                    | 18.8                                                                                            | 44.3                                                                                              |
| Particle size for the material ( $d_{NP}$ )       | 76.4                                                                                                    | 80.4                                                                                            | 55.5                                                                                              |
| Density of the particles ( $\rho$ )               | < 0.0                                                                                                   | < 0.0                                                                                           | < 0.0                                                                                             |
| Residual                                          | 0.5                                                                                                     | 0.8                                                                                             | 0.2                                                                                               |
| Combined standard uncertainty ( $\text{L}^{-1}$ ) | $2.3 \times 10^{12} \text{ L}^{-1}$                                                                     | $3.0 \times 10^{12} \text{ L}^{-1}$                                                             | $1.8 \times 10^{12} \text{ L}^{-1}$                                                               |
| Expanded k=2 uncertainty ( $\text{L}^{-1}$ )      | $4.4 \times 10^{12} \text{ L}^{-1}$                                                                     | $6.0 \times 10^{12} \text{ L}^{-1}$                                                             | $3.5 \times 10^{12} \text{ L}^{-1}$                                                               |

| <b>For 100 nm AuNPs:</b>                          | <b>TEM (Supplier)</b><br>( $PNC_{mean}$<br>$4.50 \times 10^{12} \text{ L}^{-1}$ ) | <b>HR-SEM</b><br>( $PNC_{mean}$<br>$5.50 \times 10^{12} \text{ L}^{-1}$ ) | <b>spICP-MS</b><br>( $PNC_{mean}$<br>$5.58 \times 10^{12} \text{ L}^{-1}$ ) |
|---------------------------------------------------|-----------------------------------------------------------------------------------|---------------------------------------------------------------------------|-----------------------------------------------------------------------------|
| <b>Source of uncertainty</b>                      | <b>Relative contribution (%)</b>                                                  | <b>Relative contribution (%)</b>                                          | <b>Relative contribution (%)</b>                                            |
| Au mass fraction of the material ( $C_S$ )        | 34.3                                                                              | 29.9                                                                      | 47.0                                                                        |
| Particle size for the material ( $d_{NP}$ )       | 65.3                                                                              | 69.7                                                                      | 52.8                                                                        |
| Density of the particles ( $\rho$ )               | < 0.0                                                                             | < 0.0                                                                     | < 0.0                                                                       |
| Residual                                          | 0.4                                                                               | 0.4                                                                       | 0.2                                                                         |
| Combined standard uncertainty ( $\text{L}^{-1}$ ) | $3.7 \times 10^{11} \text{ L}^{-1}$                                               | $4.6 \times 10^{11} \text{ L}^{-1}$                                       | $3.8 \times 10^{11} \text{ L}^{-1}$                                         |
| Expanded k=2 uncertainty ( $\text{L}^{-1}$ )      | $7.4 \times 10^{11} \text{ L}^{-1}$                                               | $9.1 \times 10^{11} \text{ L}^{-1}$                                       | $7.5 \times 10^{11} \text{ L}^{-1}$                                         |

**Table S-21. Average uncertainty budget for the ratio between  $PNC_{direct}$  and  $PNC_{mean}$ , expressed in percentage, for 30 nm, 60 nm, and 100 nm commercial AuNPs, respectively.  $PNC_{mean}$  values were derived based on the combination of in-house Au mass fraction and the Huber estimates of particle size (or central tendency) reported by TEM (supplier)<sup>16</sup> (first column), HR-SEM<sup>1</sup> (second column), and spICP-MS<sup>1</sup> (third column).**

| <b>For 30 nm AuNPs:</b>                                               | <b>TEM (Supplier)</b><br><i>(<math>PNC_{direct}/PNC_{mean}</math>)</i> | <b>HR-SEM</b><br><i>(<math>PNC_{direct}/PNC_{mean}</math>)</i> | <b>spICP-MS</b><br><i>(<math>PNC_{direct}/PNC_{mean}</math>)</i> |
|-----------------------------------------------------------------------|------------------------------------------------------------------------|----------------------------------------------------------------|------------------------------------------------------------------|
|                                                                       | <b>107.7 %</b>                                                         | <b>98.8 %</b>                                                  | <b>101.4 %</b>                                                   |
| <b>Source of uncertainty</b>                                          | <b>Relative contribution (%)</b>                                       | <b>Relative contribution (%)</b>                               | <b>Relative contribution (%)</b>                                 |
| Particle size consensus value for standard ( $d_{NP\ RM}$ )           | 2.6                                                                    | 0.7                                                            | 3.2                                                              |
| Dilution Factor of stock suspension for the sample ( $Dil.F$ )        | 5.9                                                                    | 2.0                                                            | 7.4                                                              |
| Measurement repeatability ( $Rep$ )                                   | 4.1                                                                    | 1.2                                                            | 5.0                                                              |
| Number of observed events for the sample ( $N_{NP}$ )                 | 21.3                                                                   | 6.1                                                            | 27.0                                                             |
| Au mass fraction of the standard ( $C_{S\ RM}$ )                      | 0.5                                                                    | 0.2                                                            | 0.6                                                              |
| Sample uptake rate for the standard ( $q_{liq\ RM}$ )                 | 0.4                                                                    | 0.1                                                            | 0.5                                                              |
| Time of acquisition for the standard ( $t_{aq\ RM}$ )                 | < 0.0                                                                  | < 0.0                                                          | < 0.0                                                            |
| Number of observed events for the standard ( $N_{NP\ RM}$ )           | 11.7                                                                   | 3.3                                                            | 13.9                                                             |
| Sample uptake rate for the sample ( $q_{liq}$ )                       | 0.4                                                                    | 0.1                                                            | 0.5                                                              |
| Time of acquisition for the sample ( $t_{aq}$ )                       | < 0.0                                                                  | < 0.0                                                          | < 0.0                                                            |
| Dilution Factor of stock suspension for the standard ( $Dil.F_{RM}$ ) | 2.9                                                                    | 1.0                                                            | 3.6                                                              |
| Particle size for the sample ( $d_{NP}$ )                             | 27.9                                                                   | 77.8                                                           | 12.9                                                             |
| Au mass fraction of the sample ( $C_S$ )                              | 22.1                                                                   | 5.4                                                            | 25.3                                                             |
| Density of the particles ( $\rho$ )                                   | < 0.0                                                                  | < 0.0                                                          | < 0.0                                                            |
| Residual                                                              | 0.2                                                                    | 2.1                                                            | 0.2                                                              |
| Combined standard uncertainty (%)                                     | 9.1 %                                                                  | 17.4 %                                                         | 7.6 %                                                            |
| Expanded k=2 uncertainty (%)                                          | N/A                                                                    | 34.8 %                                                         | 15.2 %                                                           |



| <b>For 60 nm AuNPs:</b>                                               | <b>TEM (Supplier)</b><br><i>(PNC<sub>direct</sub>/PNC<sub>mean</sub>)</i> | <b>HR-SEM</b><br><i>(PNC<sub>direct</sub>/PNC<sub>mean</sub>)</i> | <b>spICP-MS</b><br><i>(PNC<sub>direct</sub>/PNC<sub>mean</sub>)</i> |
|-----------------------------------------------------------------------|---------------------------------------------------------------------------|-------------------------------------------------------------------|---------------------------------------------------------------------|
|                                                                       | <b>114.3 %</b>                                                            | <b>96.1 %</b>                                                     | <b>92.4 %</b>                                                       |
| <b>Source of uncertainty</b>                                          | <b>Relative contribution (%)</b>                                          | <b>Relative contribution (%)</b>                                  | <b>Relative contribution (%)</b>                                    |
| Particle size consensus value for standard ( $d_{NP\ RM}$ )           | 1.5                                                                       | 1.2                                                               | 2.4                                                                 |
| Dilution Factor of stock suspension for the sample ( $Dil.F$ )        | 0.2                                                                       | 0.5                                                               | 0.9                                                                 |
| Measurement repeatability ( $Rep$ )                                   | 2.4                                                                       | 1.8                                                               | 3.8                                                                 |
| Number of observed events for the sample ( $N_{NP}$ )                 | 10.2                                                                      | 7.5                                                               | 14.4                                                                |
| Au mass fraction of the standard ( $C_{SRM}$ )                        | 0.3                                                                       | 0.2                                                               | 0.5                                                                 |
| Sample uptake rate for the standard ( $q_{liq\ RM}$ )                 | 0.2                                                                       | 0.2                                                               | 0.3                                                                 |
| Time of acquisition for the standard ( $t_{aq\ RM}$ )                 | < 0.0                                                                     | < 0.0                                                             | < 0.0                                                               |
| Number of observed events for the standard ( $N_{NP\ RM}$ )           | 20.2                                                                      | 15.5                                                              | 30.3                                                                |
| Sample uptake rate for the sample ( $q_{liq}$ )                       | 0.2                                                                       | 0.2                                                               | 0.3                                                                 |
| Time of acquisition for the sample ( $t_{aq}$ )                       | < 0.0                                                                     | < 0.0                                                             | < 0.0                                                               |
| Dilution Factor of stock suspension for the standard ( $Dil.F_{RM}$ ) | 1.4                                                                       | 1.1                                                               | 2.2                                                                 |
| Particle size for the sample ( $d_{NP}$ )                             | 43.9                                                                      | 55.2                                                              | 16.0                                                                |
| Au mass fraction of the sample ( $C_S$ )                              | 18.6                                                                      | 15.8                                                              | 28.5                                                                |
| Density of the particles ( $\rho$ )                                   | < 0.0                                                                     | < 0.0                                                             | < 0.0                                                               |
| Residual                                                              | 0.5                                                                       | 0.7                                                               | 0.3                                                                 |
| Combined standard uncertainty (%)                                     | 10.9 %                                                                    | 10.7 %                                                            | 6.5 %                                                               |
| Expanded k=2 uncertainty (%)                                          | N/A                                                                       | 21.4 %                                                            | 13.1 %                                                              |

| <b>For 100 nm AuNPs:</b>                                              | <b>TEM (Supplier)</b><br><i>(PNC<sub>direct</sub>/PNC<sub>mean</sub>)</i> | <b>HR-SEM</b><br><i>(PNC<sub>direct</sub>/PNC<sub>mean</sub>)</i> | <b>spICP-MS</b><br><i>(PNC<sub>direct</sub>/PNC<sub>mean</sub>)</i> |
|-----------------------------------------------------------------------|---------------------------------------------------------------------------|-------------------------------------------------------------------|---------------------------------------------------------------------|
|                                                                       | <b>120.2 %</b>                                                            | <b>99.4 %</b>                                                     | <b>97.2 %</b>                                                       |
| <b>Source of uncertainty</b>                                          | <b>Relative contribution (%)</b>                                          | <b>Relative contribution (%)</b>                                  | <b>Relative contribution (%)</b>                                    |
| Particle size consensus value for standard ( $d_{NP\ RM}$ )           | 1.7                                                                       | 1.7                                                               | 2.2                                                                 |
| Dilution Factor of stock suspension for the sample ( $Dil.F$ )        | 2.8                                                                       | 2.8                                                               | 3.5                                                                 |
| Measurement repeatability ( $Rep$ )                                   | 2.6                                                                       | 2.6                                                               | 3.4                                                                 |
| Number of observed events for the sample ( $N_{NP}$ )                 | 18.1                                                                      | 15.7                                                              | 19.8                                                                |
| Au mass fraction of the standard ( $C_{SRM}$ )                        | 0.3                                                                       | 0.3                                                               | 0.4                                                                 |
| Sample uptake rate for the standard ( $q_{liq\ RM}$ )                 | 0.2                                                                       | 0.2                                                               | 0.3                                                                 |
| Time of acquisition for the standard ( $t_{aq\ RM}$ )                 | < 0.0                                                                     | < 0.0                                                             | < 0.0                                                               |
| Number of observed events for the standard ( $N_{NP\ RM}$ )           | 8.5                                                                       | 8.7                                                               | 11.1                                                                |
| Sample uptake rate for the sample ( $q_{liq}$ )                       | 0.2                                                                       | 0.2                                                               | 0.3                                                                 |
| Time of acquisition for the sample ( $t_{aq}$ )                       | < 0.0                                                                     | < 0.0                                                             | < 0.0                                                               |
| Dilution Factor of stock suspension for the standard ( $Dil.F_{RM}$ ) | 3.3                                                                       | 3.4                                                               | 4.3                                                                 |
| Particle size for the sample ( $d_{NP}$ )                             | 41.2                                                                      | 43.9                                                              | 28.0                                                                |
| Au mass fraction of the sample ( $C_S$ )                              | 20.7                                                                      | 20.2                                                              | 26.4                                                                |
| Density of the particles ( $\rho$ )                                   | < 0.0                                                                     | < 0.0                                                             | < 0.0                                                               |
| Residual                                                              | 0.4                                                                       | 0.4                                                               | 0.2                                                                 |
| Combined standard uncertainty (%)                                     | 11.4 %                                                                    | 9.7 %                                                             | 7.9 %                                                               |
| Expanded k=2 uncertainty (%)                                          | N/A                                                                       | 19.3 %                                                            | 15.9 %                                                              |

**Table S-22. Average uncertainty budget for the calculation of  $PNC_{distribution}$  of 30 nm, 60 nm, and 100 nm commercial AuNPs, respectively. Full particle size distribution reported by TEM (supplier)<sup>16</sup> (first column), HR-SEM<sup>1</sup> (second column), and spICP-MS<sup>1</sup> (third column) were combined with in-house Au mass fraction to derive  $PNC_{distribution}$ .**

| <b>For 30 nm AuNPs:</b>                     |                                                                                                                             |                                                                                                                     |                                                                                                                       |
|---------------------------------------------|-----------------------------------------------------------------------------------------------------------------------------|---------------------------------------------------------------------------------------------------------------------|-----------------------------------------------------------------------------------------------------------------------|
|                                             | <b>TEM (Supplier)</b><br><i>(<math>PNC_{distribution}</math>)</i><br><b><math>2.14 \times 10^{14} \text{ L}^{-1}</math></b> | <b>HR-SEM</b><br><i>(<math>PNC_{distribution}</math>)</i><br><b><math>2.54 \times 10^{14} \text{ L}^{-1}</math></b> | <b>spICP-MS</b><br><i>(<math>PNC_{distribution}</math>)</i><br><b><math>2.60 \times 10^{14} \text{ L}^{-1}</math></b> |
| <b>Source of uncertainty</b>                | <b>Relative contribution (%)</b>                                                                                            | <b>Relative contribution (%)</b>                                                                                    | <b>Relative contribution (%)</b>                                                                                      |
| Au mass fraction of the material ( $C_S$ )  | 33.7                                                                                                                        | 6.1                                                                                                                 | 50.3                                                                                                                  |
| Particle size for the material ( $d_{NP}$ ) | 56.2                                                                                                                        | 91.2                                                                                                                | 35.3                                                                                                                  |
| Density of the particles ( $\rho$ )         | < 0.0                                                                                                                       | < 0.0                                                                                                               | < 0.0                                                                                                                 |
| Spread of particle size distribution        | 9.8                                                                                                                         | 0.3                                                                                                                 | 14.3                                                                                                                  |
| Residual                                    | 0.2                                                                                                                         | 2.4                                                                                                                 | 0.1                                                                                                                   |
| Combined standard uncertainty ( $L^{-1}$ )  | $1.6 \times 10^{13} \text{ L}^{-1}$                                                                                         | $4.3 \times 10^{13} \text{ L}^{-1}$                                                                                 | $1.6 \times 10^{13} \text{ L}^{-1}$                                                                                   |
| Expanded k=2 uncertainty ( $L^{-1}$ )       | $3.2 \times 10^{13} \text{ L}^{-1}$                                                                                         | $8.6 \times 10^{13} \text{ L}^{-1}$                                                                                 | $3.1 \times 10^{13} \text{ L}^{-1}$                                                                                   |

| <b>For 60 nm AuNPs:</b>                     |                                                                                                                             |                                                                                                                     |                                                                                                                       |
|---------------------------------------------|-----------------------------------------------------------------------------------------------------------------------------|---------------------------------------------------------------------------------------------------------------------|-----------------------------------------------------------------------------------------------------------------------|
|                                             | <b>TEM (Supplier)</b><br><i>(<math>PNC_{distribution}</math>)</i><br><b><math>2.80 \times 10^{13} \text{ L}^{-1}</math></b> | <b>HR-SEM</b><br><i>(<math>PNC_{distribution}</math>)</i><br><b><math>3.31 \times 10^{13} \text{ L}^{-1}</math></b> | <b>spICP-MS</b><br><i>(<math>PNC_{distribution}</math>)</i><br><b><math>3.41 \times 10^{13} \text{ L}^{-1}</math></b> |
| <b>Source of uncertainty</b>                | <b>Relative contribution (%)</b>                                                                                            | <b>Relative contribution (%)</b>                                                                                    | <b>Relative contribution (%)</b>                                                                                      |
| Au mass fraction of the material ( $C_S$ )  | 21.1                                                                                                                        | 18.7                                                                                                                | 43.3                                                                                                                  |
| Particle size for the material ( $d_{NP}$ ) | 66.9                                                                                                                        | 77.8                                                                                                                | 52.8                                                                                                                  |
| Density of the particles ( $\rho$ )         | < 0.0                                                                                                                       | < 0.0                                                                                                               | < 0.0                                                                                                                 |
| Spread of particle size distribution        | 11.6                                                                                                                        | 0.8                                                                                                                 | 3.7                                                                                                                   |
| Residual                                    | 0.4                                                                                                                         | 2.7                                                                                                                 | 0.2                                                                                                                   |
| Combined standard uncertainty ( $L^{-1}$ )  | $2.8 \times 10^{12} \text{ L}^{-1}$                                                                                         | $3.6 \times 10^{12} \text{ L}^{-1}$                                                                                 | $2.1 \times 10^{12} \text{ L}^{-1}$                                                                                   |
| Expanded k=2 uncertainty ( $L^{-1}$ )       | $5.7 \times 10^{12} \text{ L}^{-1}$                                                                                         | $7.2 \times 10^{12} \text{ L}^{-1}$                                                                                 | $4.1 \times 10^{12} \text{ L}^{-1}$                                                                                   |

| <b>For 100 nm AuNPs:</b>                         | <b>TEM (Supplier)</b><br>( <i>PNC</i> distribution<br><b>5.09 x 10<sup>12</sup> L<sup>-1</sup></b> ) | <b>HR-SEM</b><br>( <i>PNC</i> distribution<br><b>6.27 x 10<sup>12</sup> L<sup>-1</sup></b> ) | <b>spICP-MS</b><br>( <i>PNC</i> distribution<br><b>6.66 x 10<sup>12</sup> L<sup>-1</sup></b> ) |
|--------------------------------------------------|------------------------------------------------------------------------------------------------------|----------------------------------------------------------------------------------------------|------------------------------------------------------------------------------------------------|
| <b>Source of uncertainty</b>                     | <b>Relative contribution (%)</b>                                                                     | <b>Relative contribution (%)</b>                                                             | <b>Relative contribution (%)</b>                                                               |
| Au mass fraction of the material ( $C_S$ )       | 31.4                                                                                                 | 29.8                                                                                         | 46.1                                                                                           |
| Particle size for the material ( $d_{NP}$ )      | 55.8                                                                                                 | 69.3                                                                                         | 51.3                                                                                           |
| Density of the particles ( $\rho$ )              | < 0.0                                                                                                | < 0.0                                                                                        | < 0.0                                                                                          |
| Spread of particle size distribution             | 12.5                                                                                                 | 0.4                                                                                          | 2.4                                                                                            |
| Residual                                         | 0.4                                                                                                  | 0.4                                                                                          | 0.2                                                                                            |
| Combined standard uncertainty (L <sup>-1</sup> ) | 4.9 x 10 <sup>11</sup> L <sup>-1</sup>                                                               | 0.5 x 10 <sup>12</sup> L <sup>-1</sup>                                                       | 4.6 x 10 <sup>11</sup> L <sup>-1</sup>                                                         |
| Expanded k=2 uncertainty (L <sup>-1</sup> )      | 9.7 x 10 <sup>11</sup> L <sup>-1</sup>                                                               | 1.0 x 10 <sup>12</sup> L <sup>-1</sup>                                                       | 9.2 x 10 <sup>11</sup> L <sup>-1</sup>                                                         |

**Table S-23. Average uncertainty budget for the ratio between  $PNC_{direct}$  and  $PNC_{distribution}$ , expressed in percentage, for 30 nm, 60 nm, and 100 nm commercial AuNPs, respectively.  $PNC_{distribution}$  values were derived based on the combination of in-house Au mass fraction and the full size distribution of particle diameters reported by TEM (supplier)<sup>16</sup> (first column), HR-SEM<sup>1</sup> (second column), and spICP-MS<sup>1</sup> (third column).**

|                                                                       | <b>TEM (Supplier)</b><br><i>(<math>PNC_{direct}/PNC_{distribution}</math>)</i> | <b>HR-SEM</b><br><i>(<math>PNC_{direct}/PNC_{distribution}</math>)</i> | <b>spICP-MS</b><br><i>(<math>PNC_{direct}/PNC_{distribution}</math>)</i> |
|-----------------------------------------------------------------------|--------------------------------------------------------------------------------|------------------------------------------------------------------------|--------------------------------------------------------------------------|
| <b>For 30 nm AuNPs:</b>                                               | <b>101.5 %</b>                                                                 | <b>83.7 %</b>                                                          | <b>82.0 %</b>                                                            |
| <b>Source of uncertainty</b>                                          | <b>Relative contribution (%)</b>                                               | <b>Relative contribution (%)</b>                                       | <b>Relative contribution (%)</b>                                         |
| Particle size consensus value for standard ( $d_{NP RM}$ )            | 2.3                                                                            | 0.7                                                                    | 2.8                                                                      |
| Dilution Factor of stock suspension for the sample ( $Dil.F$ )        | 5.4                                                                            | 2.0                                                                    | 6.6                                                                      |
| Measurement repeatability ( $Rep$ )                                   | 3.6                                                                            | 1.1                                                                    | 4.4                                                                      |
| Number of observed events for the sample ( $N_{NP}$ )                 | 19.1                                                                           | 6.0                                                                    | 24.2                                                                     |
| Au mass fraction of the standard ( $C_{SRM}$ )                        | 0.5                                                                            | 0.1                                                                    | 0.6                                                                      |
| Sample uptake rate for the standard ( $q_{liq RM}$ )                  | 0.3                                                                            | 0.1                                                                    | 0.4                                                                      |
| Time of acquisition for the standard ( $t_{aq RM}$ )                  | < 0.0                                                                          | < 0.0                                                                  | < 0.0                                                                    |
| Number of observed events for the standard ( $N_{NP RM}$ )            | 10.2                                                                           | 3.3                                                                    | 12.1                                                                     |
| Sample uptake rate for the sample ( $q_{liq}$ )                       | 0.3                                                                            | 0.1                                                                    | 0.4                                                                      |
| Time of acquisition for the sample ( $t_{aq}$ )                       | < 0.0                                                                          | < 0.0                                                                  | < 0.0                                                                    |
| Dilution Factor of stock suspension for the standard ( $Dil.F_{RM}$ ) | 2.6                                                                            | 0.9                                                                    | 3.2                                                                      |
| Particle size for the sample ( $d_{NP}$ )                             | 28.3                                                                           | 77.9                                                                   | 13.8                                                                     |
| Au mass fraction of the sample ( $C_S$ )                              | 21.5                                                                           | 5.4                                                                    | 25.6                                                                     |
| Density of the particles ( $\rho$ )                                   | < 0.0                                                                          | < 0.0                                                                  | < 0.0                                                                    |
| Spread of the particle size distribution                              | 5.7                                                                            | 0.2                                                                    | 5.9                                                                      |
| Residual                                                              | 0.2                                                                            | 2.1                                                                    | 0.2                                                                      |
| Combined standard uncertainty (%)                                     | 9.2 %                                                                          | 14.9 %                                                                 | 6.6 %                                                                    |
| Expanded k=2 uncertainty (%)                                          | N/A                                                                            | 29.8 %                                                                 | 13.2 %                                                                   |

|                                                                       | TEM (Supplier)<br>( $PNC_{direct}/PNC_{distribution}$ ) | HR-SEM<br>( $PNC_{direct}/PNC_{distribution}$ ) | spICP-MS<br>( $PNC_{direct}/PNC_{distribution}$ ) |
|-----------------------------------------------------------------------|---------------------------------------------------------|-------------------------------------------------|---------------------------------------------------|
| <b>For 60 nm AuNPs:</b>                                               | <b>101.5 %</b>                                          | <b>82.4 %</b>                                   | <b>79.7 %</b>                                     |
| Source of uncertainty                                                 | Relative contribution (%)                               | Relative contribution (%)                       | Relative contribution (%)                         |
| Particle size consensus value for standard ( $d_{NP\ RM}$ )           | 1.3                                                     | 1.1                                             | 2.4                                               |
| Dilution Factor of stock suspension for the sample ( $Dil.F$ )        | 0.6                                                     | 0.5                                             | 0.9                                               |
| Measurement repeatability ( $Rep$ )                                   | 2.0                                                     | 1.8                                             | 3.7                                               |
| Number of observed events for the sample ( $N_{NP}$ )                 | 8.9                                                     | 7.5                                             | 14.2                                              |
| Au mass fraction of the standard ( $C_{S\ RM}$ )                      | 0.3                                                     | 0.2                                             | 0.5                                               |
| Sample uptake rate for the standard ( $q_{liq\ RM}$ )                 | 0.2                                                     | 0.2                                             | 0.3                                               |
| Time of acquisition for the standard ( $t_{aq\ RM}$ )                 | < 0.0                                                   | < 0.0                                           | < 0.0                                             |
| Number of observed events for the standard ( $N_{NP\ RM}$ )           | 17.9                                                    | 14.5                                            | 29.6                                              |
| Sample uptake rate for the sample ( $q_{liq}$ )                       | 0.2                                                     | 0.2                                             | 0.3                                               |
| Time of acquisition for the sample ( $t_{aq}$ )                       | < 0.0                                                   | < 0.0                                           | < 0.0                                             |
| Dilution Factor of stock suspension for the standard ( $Dil.F_{RM}$ ) | 1.2                                                     | 1.1                                             | 2.2                                               |
| Particle size for the sample ( $d_{NP}$ )                             | 42.6                                                    | 54.6                                            | 16.3                                              |
| Au mass fraction of the sample ( $C_S$ )                              | 17.5                                                    | 15.8                                            | 28.4                                              |
| Density of the particles ( $\rho$ )                                   | < 0.0                                                   | < 0.0                                           | < 0.0                                             |
| Spread of the particle size distribution                              | 7.6                                                     | 1.9                                             | 0.9                                               |
| Residual                                                              | 0.5                                                     | 0.7                                             | 0.3                                               |
| Combined standard uncertainty (%)                                     | 10.5 %                                                  | 7.8 %                                           | 5.7 %                                             |
| Expanded k=2 uncertainty (%)                                          | N/A                                                     | 17.9 %                                          | 11.4 %                                            |

| For 100 nm AuNPs:                                                     | TEM (Supplier)                        | HR-SEM                                | spICP-MS                              |
|-----------------------------------------------------------------------|---------------------------------------|---------------------------------------|---------------------------------------|
|                                                                       | ( $PNC_{direct}/PNC_{distribution}$ ) | ( $PNC_{direct}/PNC_{distribution}$ ) | ( $PNC_{direct}/PNC_{distribution}$ ) |
|                                                                       | 106.4 %                               | 87.0 %                                | 81.5 %                                |
| Source of uncertainty                                                 | Relative contribution (%)             | Relative contribution (%)             | Relative contribution (%)             |
| Particle size consensus value for standard ( $d_{NP RM}$ )            | 1.4                                   | 1.7                                   | 2.1                                   |
| Dilution Factor of stock suspension for the sample ( $Dil.F$ )        | 2.3                                   | 2.8                                   | 3.5                                   |
| Measurement repeatability ( $Rep$ )                                   | 2.2                                   | 2.6                                   | 3.3                                   |
| Number of observed events for the sample ( $N_{NP}$ )                 | 16.4                                  | 15.6                                  | 19.1                                  |
| Au mass fraction of the standard ( $C_{S RM}$ )                       | 0.3                                   | 0.3                                   | 0.4                                   |
| Sample uptake rate for the standard ( $q_{liq RM}$ )                  | 0.2                                   | 0.2                                   | 0.3                                   |
| Time of acquisition for the standard ( $t_{aq RM}$ )                  | < 0.0                                 | < 0.0                                 | < 0.0                                 |
| Number of observed events for the standard ( $N_{NP RM}$ )            | 7.0                                   | 8.6                                   | 10.8                                  |
| Sample uptake rate for the sample ( $q_{liq}$ )                       | 0.2                                   | 0.2                                   | 0.3                                   |
| Time of acquisition for the sample ( $t_{aq}$ )                       | < 0.0                                 | < 0.0                                 | < 0.0                                 |
| Dilution Factor of stock suspension for the standard ( $Dil.F_{RM}$ ) | 2.7                                   | 3.3                                   | 4.2                                   |
| Particle size for the sample ( $d_{NP}$ )                             | 38.0                                  | 43.9                                  | 28.0                                  |
| Au mass fraction of the sample ( $C_S$ )                              | 20.1                                  | 20.0                                  | 26.5                                  |
| Density of the particles ( $\rho$ )                                   | < 0.0                                 | < 0.0                                 | < 0.0                                 |
| Spread of the particle size distribution                              | 9.0                                   | 0.3                                   | 1.2                                   |
| Residual                                                              | 0.3                                   | 0.4                                   | 0.2                                   |
| Combined standard uncertainty (%)                                     | 11.2 %                                | 8.3 %                                 | 6.8 %                                 |
| Expanded k=2 uncertainty (%)                                          | N/A                                   | 16.6 %                                | 13.3 %                                |

**Table S-24. PNC derived for different commercial AuNPs using in-house Au mass fraction determinations and: the Huber estimates of particle size location (or central tendency) (first column), and the full particle size distribution (second column) measured by spICP-MS.**

|                              | Central Tendency ( $PNC_{mean}$ ) <sup>a</sup>       | Full PSD ( $PNC_{distribution}$ )                    |
|------------------------------|------------------------------------------------------|------------------------------------------------------|
| <b>30 nm PVP</b>             |                                                      |                                                      |
| spICP-MS <sup>b</sup>        | $2.06 \times 10^{14} \pm 0.27 \times 10^{14} L^{-1}$ | $2.37 \times 10^{14} \pm 0.33 \times 10^{14} L^{-1}$ |
| <b>30 nm bPEI</b>            |                                                      |                                                      |
| spICP-MS <sup>b</sup>        | $1.97 \times 10^{14} \pm 0.28 \times 10^{14} L^{-1}$ | $2.23 \times 10^{14} \pm 0.34 \times 10^{14} L^{-1}$ |
| <b>30 nm PEG</b>             |                                                      |                                                      |
| spICP-MS <sup>b</sup>        | $1.88 \times 10^{14} \pm 0.18 \times 10^{14} L^{-1}$ | $2.31 \times 10^{14} \pm 0.24 \times 10^{14} L^{-1}$ |
| <b>60 nm PVP</b>             |                                                      |                                                      |
| spICP-MS <sup>b</sup>        | $2.63 \times 10^{13} \pm 0.37 \times 10^{13} L^{-1}$ | $3.24 \times 10^{13} \pm 0.47 \times 10^{13} L^{-1}$ |
| <b>60 nm bPEI first lot</b>  |                                                      |                                                      |
| spICP-MS <sup>b</sup>        | $2.65 \times 10^{13} \pm 0.55 \times 10^{13} L^{-1}$ | $3.18 \times 10^{13} \pm 0.66 \times 10^{13} L^{-1}$ |
| <b>60 nm bPEI second lot</b> |                                                      |                                                      |
| spICP-MS <sup>b</sup>        | $2.87 \times 10^{13} \pm 0.17 \times 10^{13} L^{-1}$ | $3.36 \times 10^{13} \pm 0.20 \times 10^{13} L^{-1}$ |
| <b>60 nm PEG first lot</b>   |                                                      |                                                      |
| spICP-MS <sup>b</sup>        | $3.42 \times 10^{13} \pm 0.18 \times 10^{13} L^{-1}$ | $3.70 \times 10^{13} \pm 0.21 \times 10^{13} L^{-1}$ |
| <b>60 nm PEG second lot</b>  |                                                      |                                                      |
| spICP-MS <sup>b</sup>        | $2.56 \times 10^{13} \pm 0.39 \times 10^{13} L^{-1}$ | $2.88 \times 10^{13} \pm 0.44 \times 10^{13} L^{-1}$ |
| <b>100 nm Citrate</b>        |                                                      |                                                      |
| spICP-MS <sup>b</sup>        | $6.25 \times 10^{12} \pm 0.79 \times 10^{12} L^{-1}$ | $7.45 \times 10^{12} \pm 0.95 \times 10^{12} L^{-1}$ |
| <b>100 nm PVP</b>            |                                                      |                                                      |
| spICP-MS <sup>b</sup>        | $4.87 \times 10^{12} \pm 0.60 \times 10^{12} L^{-1}$ | $5.57 \times 10^{12} \pm 0.70 \times 10^{12} L^{-1}$ |
| <b>100 nm bPEI</b>           |                                                      |                                                      |
| spICP-MS <sup>b</sup>        | $4.86 \times 10^{12} \pm 0.86 \times 10^{12} L^{-1}$ | $5.39 \times 10^{12} \pm 0.95 \times 10^{12} L^{-1}$ |



## 100 nm PEG

spICP-MS<sup>b</sup>  $5.89 \times 10^{12} \pm 1.07 \times 10^{12} \text{L}^{-1}$   $6.86 \times 10^{12} \pm 1.25 \times 10^{12} \text{L}^{-1}$

<sup>a</sup> Assumes all analyte is present as spherical NPs of the central tendency diameter.

<sup>b</sup> Expanded uncertainties associated with the spICP-MS size determinations included a best estimate of known or suspected sources of bias. Listed uncertainties are based on a confidence interval, with the coverage factor,  $k = 2$  corresponding to approximately 95 % confidence.

---

**Table S-25. Average uncertainty budget for the calculation of  $PNC_{mean}$  of 30 nm, 60 nm, and 100 nm commercial AuNPs derived based on the combination of in-house Au mass fraction determinations and the Huber estimates of particle size (or central tendency) results simultaneously obtained by spICP-MS in this study.**

| <b>For 30 nm AuNPs:</b>                           |                                     | <b>spICP-MS simultaneous<br/>(<math>PNC_{mean}</math> <math>1.97 \times 10^{14} \text{ L}^{-1}</math>)</b> |
|---------------------------------------------------|-------------------------------------|------------------------------------------------------------------------------------------------------------|
| <b>Source of uncertainty</b>                      | <b>Relative contribution (%)</b>    |                                                                                                            |
| Au mass fraction of the material ( $C_S$ )        | 44.1                                |                                                                                                            |
| Particle size for the material ( $d_{NP}$ )       | 55.7                                |                                                                                                            |
| Density of the particles ( $\rho$ )               | < 0.0                               |                                                                                                            |
| Residual                                          | 0.2                                 |                                                                                                            |
| Combined standard uncertainty ( $\text{L}^{-1}$ ) | $1.2 \times 10^{13} \text{ L}^{-1}$ |                                                                                                            |
| Expanded k=2 uncertainty ( $\text{L}^{-1}$ )      | $2.4 \times 10^{13} \text{ L}^{-1}$ |                                                                                                            |

| <b>For 60 nm AuNPs:</b>                           |                                     | <b>spICP-MS simultaneous<br/>(<math>PNC_{mean}</math> <math>2.83 \times 10^{13} \text{ L}^{-1}</math>)</b> |
|---------------------------------------------------|-------------------------------------|------------------------------------------------------------------------------------------------------------|
| <b>Source of uncertainty</b>                      | <b>Relative contribution (%)</b>    |                                                                                                            |
| Au mass fraction of the material ( $C_S$ )        | 44.7                                |                                                                                                            |
| Particle size for the material ( $d_{NP}$ )       | 55.2                                |                                                                                                            |
| Density of the particles ( $\rho$ )               | < 0.0                               |                                                                                                            |
| Residual                                          | 0.2                                 |                                                                                                            |
| Combined standard uncertainty ( $\text{L}^{-1}$ ) | $1.7 \times 10^{12} \text{ L}^{-1}$ |                                                                                                            |
| Expanded k=2 uncertainty ( $\text{L}^{-1}$ )      | $3.3 \times 10^{12} \text{ L}^{-1}$ |                                                                                                            |

| <b>For 100 nm AuNPs:</b>                          |                                     | <b>spICP-MS simultaneous<br/>(<math>PNC_{mean}</math> <math>5.47 \times 10^{12} \text{ L}^{-1}</math>)</b> |
|---------------------------------------------------|-------------------------------------|------------------------------------------------------------------------------------------------------------|
| <b>Source of uncertainty</b>                      | <b>Relative contribution (%)</b>    |                                                                                                            |
| Au mass fraction of the material ( $C_S$ )        | 46.5                                |                                                                                                            |
| Particle size for the material ( $d_{NP}$ )       | 53.2                                |                                                                                                            |
| Density of the particles ( $\rho$ )               | < 0.0                               |                                                                                                            |
| Residual                                          | 0.3                                 |                                                                                                            |
| Combined standard uncertainty ( $\text{L}^{-1}$ ) | $4.2 \times 10^{11} \text{ L}^{-1}$ |                                                                                                            |
| Expanded k=2 uncertainty ( $\text{L}^{-1}$ )      | $8.3 \times 10^{11} \text{ L}^{-1}$ |                                                                                                            |

**Table S-26. Average uncertainty budget for the calculation of *PNC* distribution of 30 nm, 60 nm, and 100 nm commercial AuNPs derived based on the combination of in-house Au mass fraction determinations and the full particle size distribution simultaneously obtained by spICP-MS in this study.**

|                                                   | <b>30 nm AuNPs<br/>(<i>PNC</i> distribution<br/><math>2.30 \times 10^{14} \text{ L}^{-1}</math>)</b> | <b>60 nm AuNPs<br/>(<i>PNC</i> distribution<br/><math>3.27 \times 10^{13} \text{ L}^{-1}</math>)</b> | <b>100 nm AuNPs<br/>(<i>PNC</i> distribution<br/><math>6.32 \times 10^{12} \text{ L}^{-1}</math>)</b> |
|---------------------------------------------------|------------------------------------------------------------------------------------------------------|------------------------------------------------------------------------------------------------------|-------------------------------------------------------------------------------------------------------|
| <b>Source of uncertainty</b>                      | <b>Relative contribution (%)</b>                                                                     | <b>Relative contribution (%)</b>                                                                     | <b>Relative contribution (%)</b>                                                                      |
| Au mass fraction of the material ( $C_S$ )        | 41.4                                                                                                 | 43.6                                                                                                 | 46.0                                                                                                  |
| Particle size for the material ( $d_{NP}$ )       | 51.6                                                                                                 | 53.6                                                                                                 | 52.5                                                                                                  |
| Density of the particles ( $\rho$ )               | < 0.0                                                                                                | < 0.0                                                                                                | < 0.0                                                                                                 |
| Spread of particle size distribution              | 6.8                                                                                                  | 2.6                                                                                                  | 1.3                                                                                                   |
| Residual                                          | 0.2                                                                                                  | 0.2                                                                                                  | 0.3                                                                                                   |
| Combined standard uncertainty ( $\text{L}^{-1}$ ) | $0.6 \times 10^{13} \text{ L}^{-1}$                                                                  | $0.4 \times 10^{12} \text{ L}^{-1}$                                                                  | $0.7 \times 10^{11} \text{ L}^{-1}$                                                                   |
| Expanded k=2 uncertainty ( $\text{L}^{-1}$ )      | $3.0 \times 10^{13} \text{ L}^{-1}$                                                                  | $4.0 \times 10^{12} \text{ L}^{-1}$                                                                  | $9.7 \times 10^{11} \text{ L}^{-1}$                                                                   |

**Table S-27. Average uncertainty budget for the ratio between  $PNC_{direct}$  and  $PNC_{mean}$ , expressed in percentage, for 30 nm, 60 nm, and 100 nm commercial AuNPs, respectively.  $PNC_{mean}$  values reported for purposes of comparison to  $PNC_{direct}$  were derived based on the combination of in-house Au mass fraction and the Huber estimates of particle size (or central tendency) results simultaneously obtained by spICP-MS in this study.**

|                                                                       | For 30 nm AuNPs<br>( $PNC_{direct}/PNC_{mean}$ ) | For 60 nm AuNPs<br>( $PNC_{direct}/PNC_{mean}$ ) | For 100 nm AuNPs<br>( $PNC_{direct}/PNC_{mean}$ ) |
|-----------------------------------------------------------------------|--------------------------------------------------|--------------------------------------------------|---------------------------------------------------|
| <b>Using spICP-MS simultaneous central tendency:</b>                  | <b>108.0 %</b>                                   | <b>96.7 %</b>                                    | <b>99.3 %</b>                                     |
| Source of uncertainty                                                 | Relative contribution (%)                        | Relative contribution (%)                        | Relative contribution (%)                         |
| Particle size consensus value for standard ( $d_{NP RM}$ )            | 11.1                                             | 2.4                                              | 1.8                                               |
| Dilution Factor of stock suspension for the sample ( $Dil.F$ )        | 5.2                                              | 0.9                                              | 3.1                                               |
| Measurement repeatability ( $Rep$ )                                   | 3.9                                              | 3.8                                              | 2.8                                               |
| Number of observed events for the sample ( $N_{NP}$ )                 | 9.3                                              | 15.0                                             | 19.7                                              |
| Au mass fraction of the standard ( $C_{S RM}$ )                       | 0.4                                              | 0.5                                              | 0.4                                               |
| Sample uptake rate for the standard ( $q_{liq RM}$ )                  | 0.3                                              | 0.3                                              | 0.2                                               |
| Time of acquisition for the standard ( $t_{aq RM}$ )                  | < 0.0                                            | < 0.0                                            | < 0.0                                             |
| Number of observed events for the standard ( $N_{NP RM}$ )            | 18.5                                             | 29.8                                             | 9.3                                               |
| Sample uptake rate for the sample ( $q_{liq}$ )                       | 0.3                                              | 0.3                                              | 0.2                                               |
| Time of acquisition for the sample ( $t_{aq}$ )                       | < 0.0                                            | < 0.0                                            | < 0.0                                             |
| Dilution Factor of stock suspension for the standard ( $Dil.F_{RM}$ ) | 2.5                                              | 2.3                                              | 3.6                                               |
| Particle size for the sample ( $d_{NP}$ )                             | 20.9                                             | 16.0                                             | 32.1                                              |
| Au mass fraction of the sample ( $C_S$ )                              | 27.2                                             | 28.4                                             | 26.4                                              |
| Density of the particles ( $\rho$ )                                   | 0.1                                              | < 0.0                                            | 0.1                                               |
| Residual                                                              | 0.2                                              | 0.3                                              | 0.3                                               |
| Combined standard uncertainty (%)                                     | 8.7 %                                            | 7.0 %                                            | 9.0 %                                             |
| Expanded k=2 uncertainty (%)                                          | 17.4 %                                           | 14.0 %                                           | 17.9 %                                            |

**Table S-28. Average uncertainty budget for the ratio between  $PNC_{direct}$  and  $PNC_{distribution}$ , expressed in percentage, for 30 nm, 60 nm, and 100 nm commercial AuNPs, respectively.  $PNC_{distribution}$  values reported for purposes of comparison to  $PNC_{direct}$  were derived based on the combination of in-house Au mass fraction and the full particle size distribution simultaneously obtained by spICP-MS in this study.**

|                                                                       | For 30 nm AuNPs<br>( $PNC_{direct}/PNC_{distribution}$ ) | For 60 nm AuNPs<br>( $PNC_{direct}/PNC_{distribution}$ ) | For 100 nm AuNPs<br>( $PNC_{direct}/PNC_{distribution}$ ) |
|-----------------------------------------------------------------------|----------------------------------------------------------|----------------------------------------------------------|-----------------------------------------------------------|
| <b>Using spICP-MS simultaneous central tendency:</b>                  | <b>92.3 %</b>                                            | <b>83.4 %</b>                                            | <b>86.2 %</b>                                             |
| Source of uncertainty                                                 | Relative contribution (%)                                | Relative contribution (%)                                | Relative contribution (%)                                 |
| Particle size consensus value for standard ( $d_{NP\ RM}$ )           | 2.6                                                      | 2.4                                                      | 1.8                                                       |
| Dilution Factor of stock suspension for the sample ( $Dil.F$ )        | 5.6                                                      | 0.9                                                      | 3.1                                                       |
| Measurement repeatability ( $Rep$ )                                   | 4.1                                                      | 3.7                                                      | 2.8                                                       |
| Number of observed events for the sample ( $N_{NP}$ )                 | 22.4                                                     | 14.8                                                     | 19.4                                                      |
| Au mass fraction of the standard ( $C_{S\ RM}$ )                      | 0.5                                                      | 0.5                                                      | 0.4                                                       |
| Sample uptake rate for the standard ( $q_{liq\ RM}$ )                 | 0.4                                                      | 0.3                                                      | 0.2                                                       |
| Time of acquisition for the standard ( $t_{aq\ RM}$ )                 | < 0.0                                                    | < 0.0                                                    | < 0.0                                                     |
| Number of observed events for the standard ( $N_{NP\ RM}$ )           | 11.6                                                     | 29.3                                                     | 9.2                                                       |
| Sample uptake rate for the sample ( $q_{liq}$ )                       | 0.4                                                      | 0.3                                                      | 0.2                                                       |
| Time of acquisition for the sample ( $t_{aq}$ )                       | < 0.0                                                    | < 0.0                                                    | < 0.0                                                     |
| Dilution Factor of stock suspension for the standard ( $Dil.F_{RM}$ ) | 2.8                                                      | 2.2                                                      | 3.5                                                       |
| Particle size for the sample ( $d_{NP}$ )                             | 22.1                                                     | 16.1                                                     | 32.1                                                      |
| Au mass fraction of the sample ( $C_S$ )                              | 24.2                                                     | 28.2                                                     | 26.3                                                      |
| Density of the particles ( $\rho$ )                                   | 0.1                                                      | < 0.0                                                    | < 0.0                                                     |
| Residual                                                              | 3.1                                                      | 0.9                                                      | 0.6                                                       |
| Combined standard uncertainty (%)                                     | 0.2                                                      | 0.2                                                      | 0.3                                                       |
| Expanded k=2 uncertainty (%)                                          | 7.7 %                                                    | 6.0 %                                                    | 7.7 %                                                     |

## FIGURES

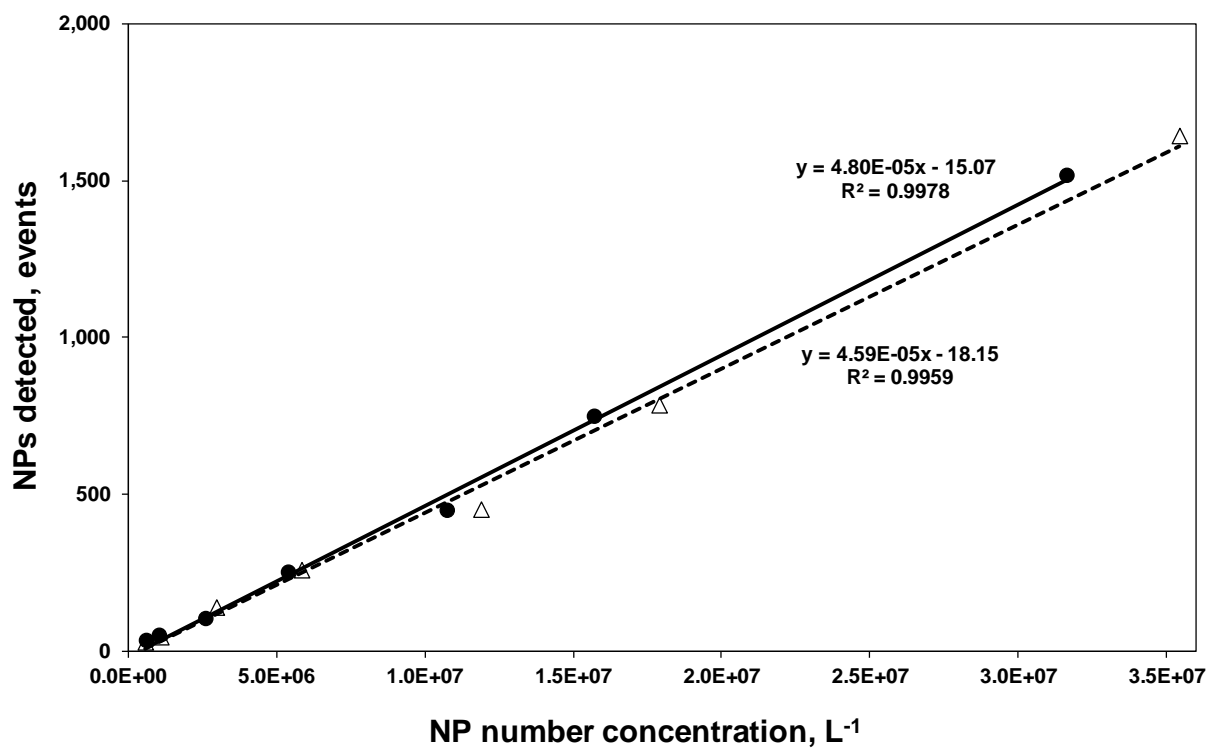

**Figure S-1.** Particle number concentration *versus* number of events for NIST RM 8012 (△) and NIST RM 8013(●). Solid lines represent the corresponding fit functions after linear regression for RM 8012 (dashed line) and RM 8013 (solid line).

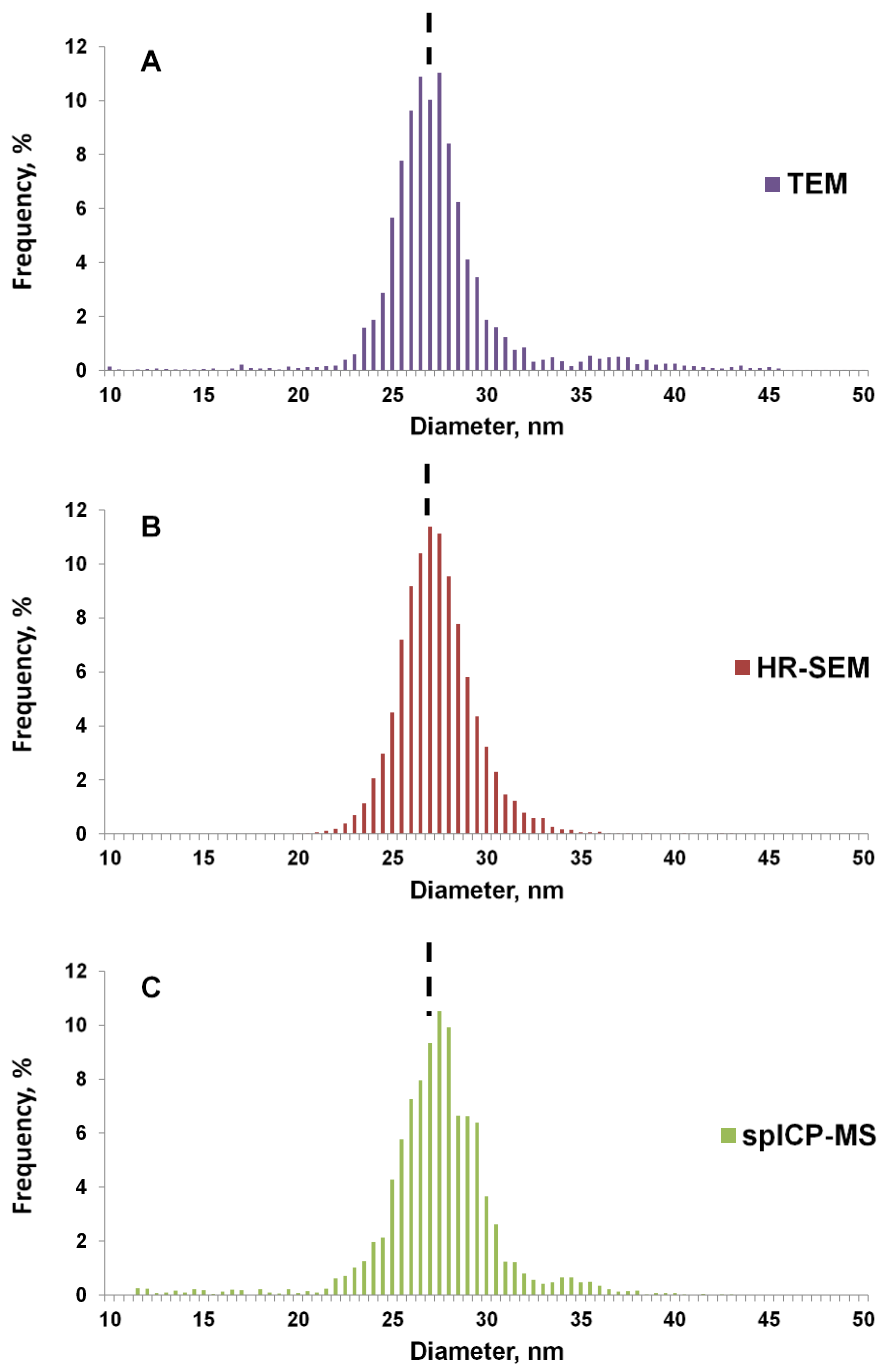

**Figure S-2.** Reference number size distribution histograms for NIST AuNP RM 8012 reported by (A) TEM (provided in NIST Report of Investigation),<sup>2</sup> (B) HR-SEM,<sup>1</sup> and (C) spICP-MS.<sup>1</sup> Bin size is 0.5 nm. Adapted from ref 1. Vertical black dashed lines indicate mean particle diameters, based on Huber estimates of particle size location (or central tendency).

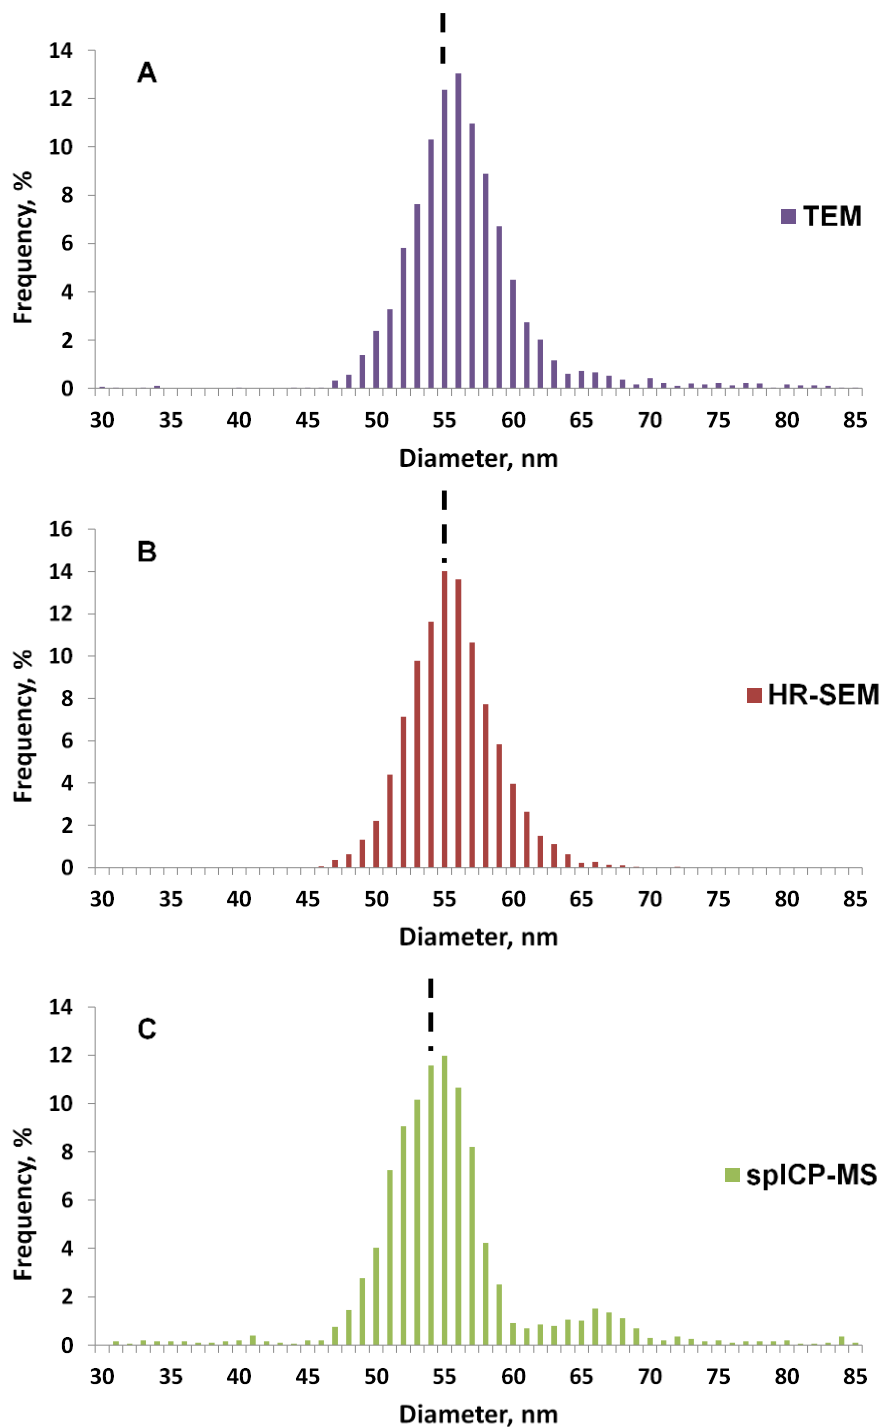

**Figure S-3.** Reference number size distribution histograms for NIST AuNP RM 8013 reported by (A) TEM (provided in NIST Report of Investigation),<sup>3</sup> (B) HR-SEM,<sup>1</sup> and (C) spICP-MS.<sup>1</sup> Bin size is 0.5 nm. Adapted from ref 1. Vertical black dashed lines indicate mean particle diameters, based on Huber estimates of particle size location (or central tendency).



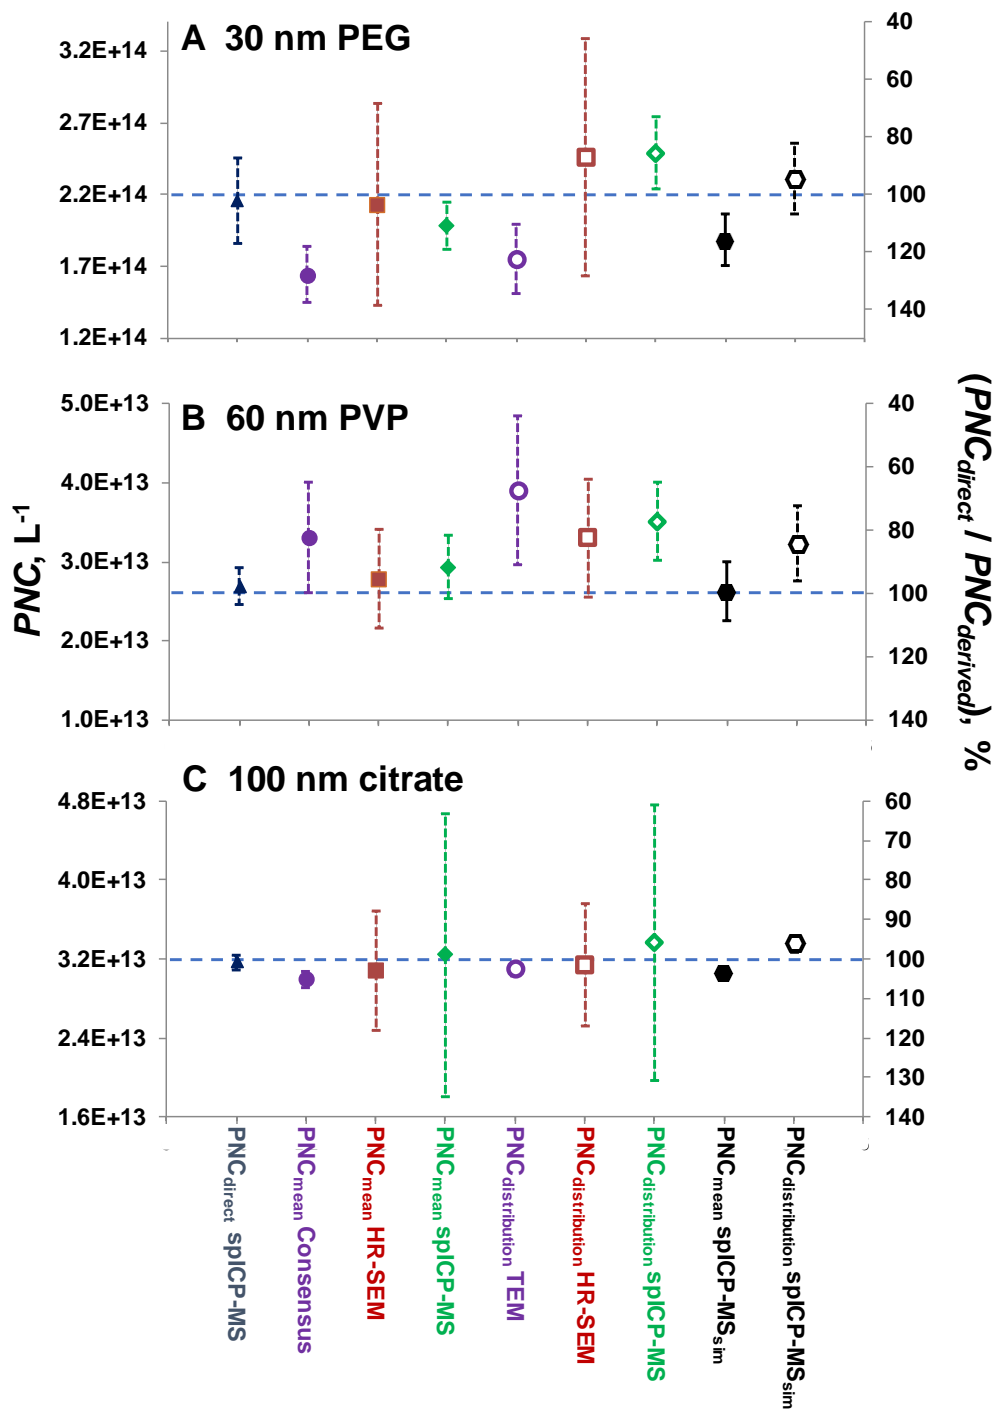

**Figure S-4.** Comparison for the PNC results (left axis) ( $PNC_{direct}$  (blue triangles), ( $PNC_{mean}$  (solid symbols), or  $PNC_{distribution}$  (open symbols)) and ratio between  $PNC_{direct}$  and derived PNCs, expressed in percentage, (right axis) for commercial PEG-coated 30 nm AuNPs (A), PVP-coated

60 nm AuNPs, (B), and citrate-coated 100 nm AuNPs (C). Values are provided for spICP-MS (blue triangles for direct PNC measurements, and black hexagons for derived PNC using simultaneous size determinations), TEM (provided by the manufacturer) (purple circles),<sup>16</sup> HR-SEM (dark red squares),<sup>1</sup> and previously reported spICP-MS (green diamonds).<sup>1</sup> The vertical bars indicate *U*95% C.I. for the measured and derived PNC values. Error bars that are not visible are smaller than data points. The horizontal blue lines represent the same value for *PNC<sub>direct</sub>* and derived *PNC*.

## REFERENCES

---

- (1) Montoro Bustos, A.R., Purushotham, K.P., Possolo, A., Farkas, N., Vladár, A.E., Murphy, K.E., Winchester, M.R. *Anal. Chem.* **2018**, *90*, 14376–14386.
- (2) NIST, Reference Material® 8012 Gold Nanoparticles, Nominal 30 nm Diameter; *National Institute of Standards and Technology*, **2015**.
- (3) NIST, Reference Material® 8013 Gold Nanoparticles, Nominal 60 nm Diameter; *National Institute of Standards and Technology*, **2015**.
- (4) Koepke, A., Lafarge, T., Possolo, A., Toman, B. *NIST Consensus Builder-User's Manual* **2017**, <https://consensus.nist.gov/NISTConsensusBuilder-UserManual.pdf>.
- (5) Koepke, A., Lafarge, T., Possolo, A., Toman, B. *Metrologia* **2017**, *54*, 34-62.
- (6) Pace, H.E.; Rogers, N.J.; Jarolimek, C.; Coleman, V.A.; Higgins, C.P.; Ranville, J.F. *Anal. Chem.* **2011**, *83*, 9361–9369.
- (7) Degueldre, C.; Favarger, P.Y.; Wold, S. *Anal. Chim. Acta*, **2006**, *555*, 263-268.
- (8) Laborda, F., Jimenez-Lamana, J.; Bolea, E.; Castillo, J.R. *J. Anal. At. Spectrom.*, **2013**, *28*, 1220-1232.
- (9) Currie, L. A. *Anal. Chem.*, **1968**, *40*, 586-593.
- (10) Laborda, F., Jimenez-Lamana, J.; Bolea, E.; Castillo, J.R. *J. Anal. At. Spectrom.*, **2011**, *26*, 1362-1371.
- (11) Lin, F. H., Miyashita, S., Inagaki, K., Liu, Y. H., Hsu, I. H. *J. Anal. At. Spectrom.*, **2019**, *34*, 401-406.
- (12) Cuello-Nunez, S., Abad-Alvaro, I.; Bartczak, D.; del Castillo Busto, M. E., Alexander Ramsay, D.; Pellegrino, F.; Goenaga-Infante, H. *J. Anal. At. Spectrom.*, **2020**, *35*, 1832-1839.
- (13) Beauchamp, C.R., Camara, J.E., Carney, J., Choquette, S.J., Cole, K.D., DeRose, P.C., Duewer, D.L., Epstein, M.S., Polakoski, M., Possolo, A., Sharpless, K.E., Sieber, J.R., Toman, B., Winchester, M.R., Windover, D. *Special Publication (NIST SP) - 260-136*, 2020.
- (14) Ramkorun-Schmidt, B., Pergantis, S.A., Esteban-Fernandez, D., Jakubowski, N., Gunther, D. *Anal. Chem.* **2015**, *87*, 8687–8694.
- (15) Liu, J., Murphy, K.E., MacCuspie, R.I., Winchester, M.R. *Anal. Chem.* **2014**, *86*, 3405-3414.
- (16) Personal communication with the commercial AuNPs supplier company.
- (17) *CRC Handbook of Chemistry and Physics*; 88th ed.; Lide, D.R., Ed.; CRC Press: Boca Raton, FL, 2007.
